# Supplementary material for: Cribriform and intraductal prostate cancer are associated with increased genomic instability and distinct genomic alterations
Source: PubMed Central journal article supplement (PMC5751811; doi:10.1186/s12885-017-3976-z), 2018-01-02

# Supplementary Figure 1

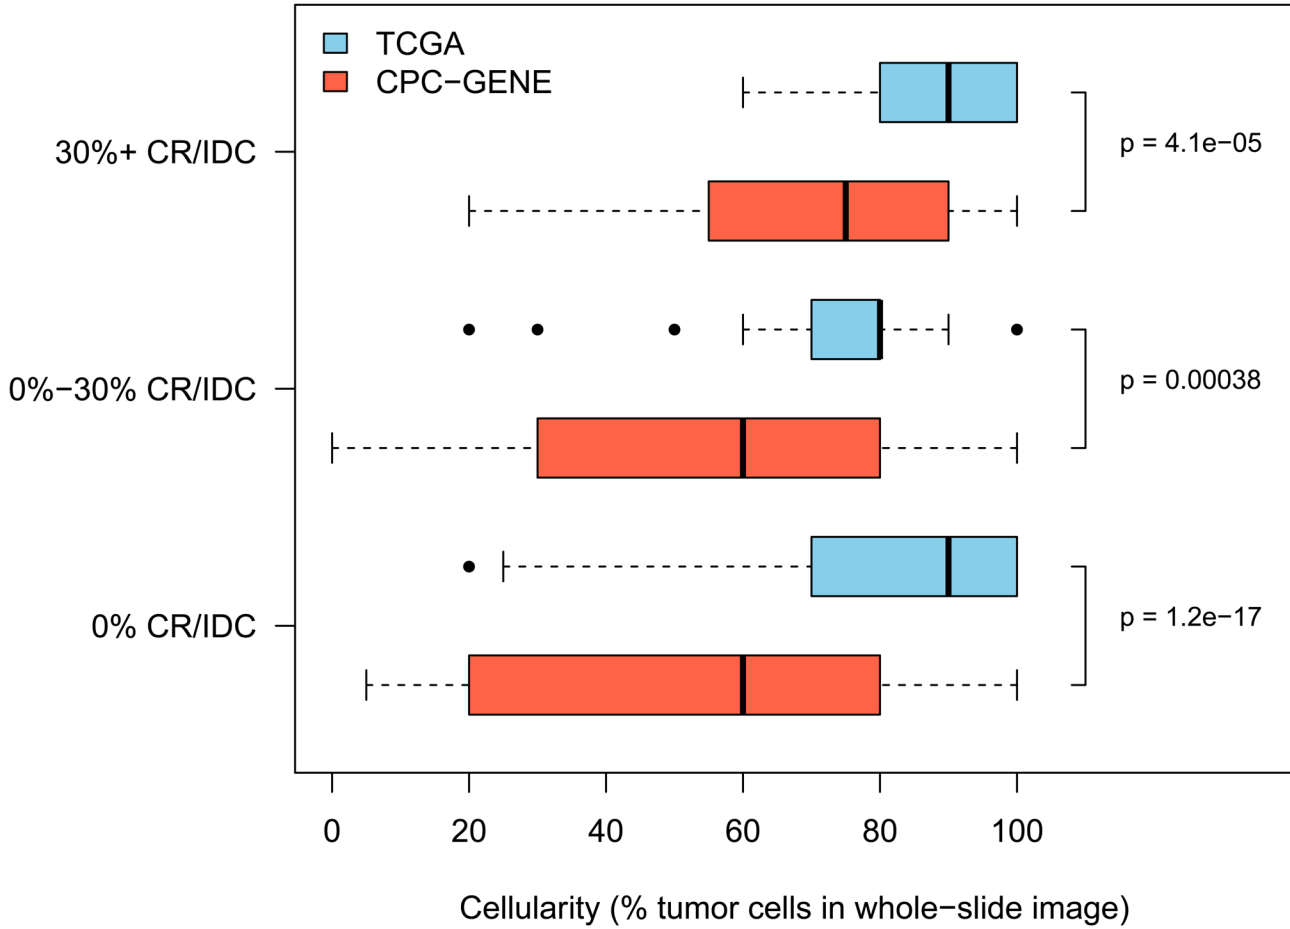

# Supplementary Figure 2

CR/IDC category

- non-CR/IDC GS7+
- non-CR GS6
- CR/IDC GS7+

## PGA per chromosome arm (deletions)

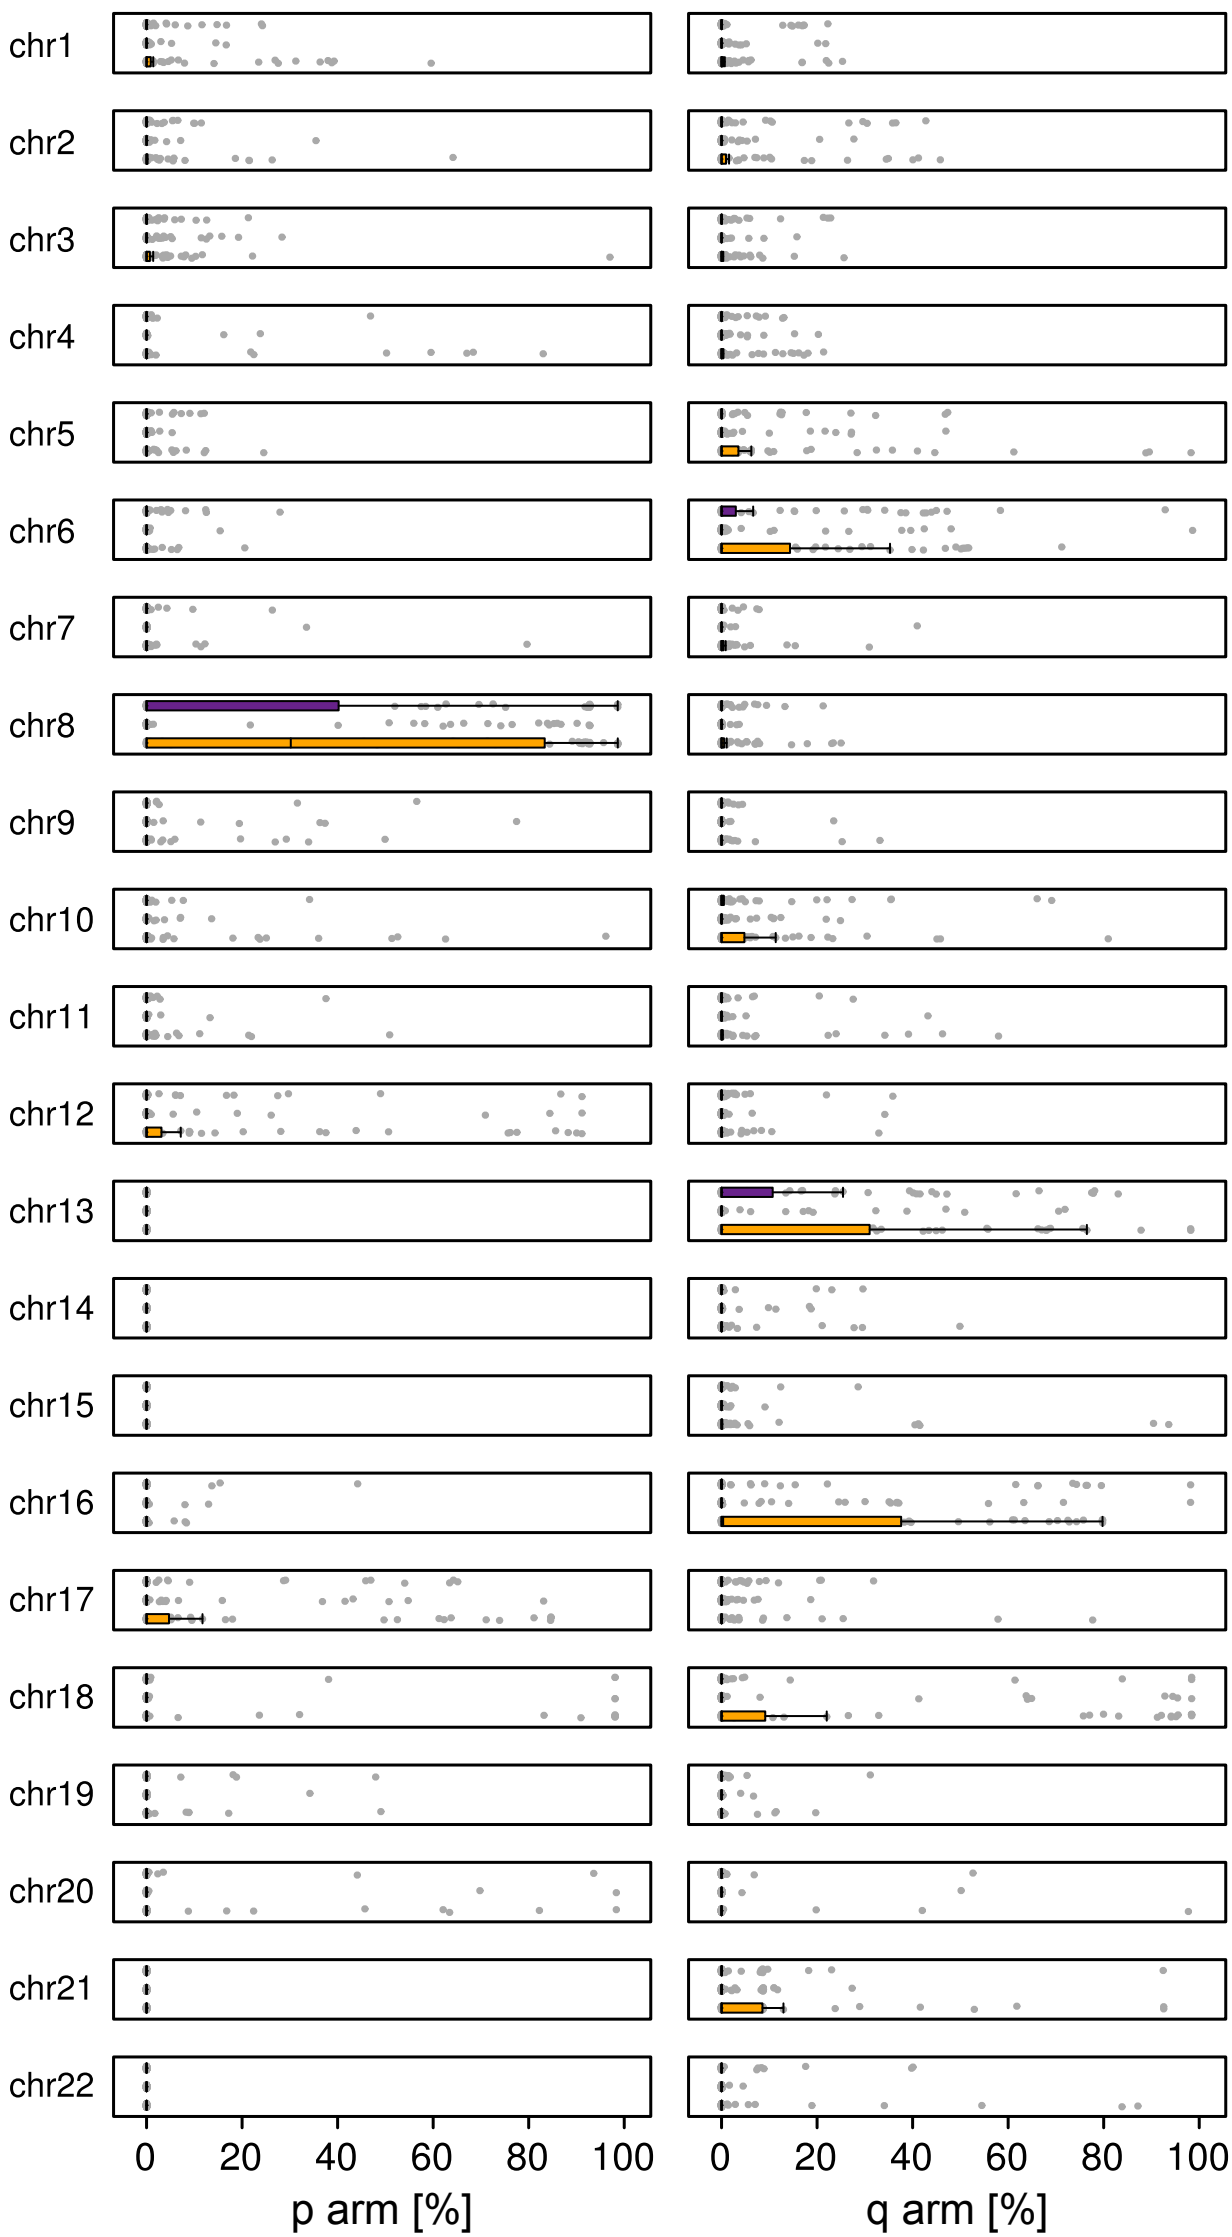

CR/IDC category  
 non-CR/IDC GS7+  
 non-CR GS6  
 CR/IDC GS7+

# PGA per chromosome arm (amplifications)

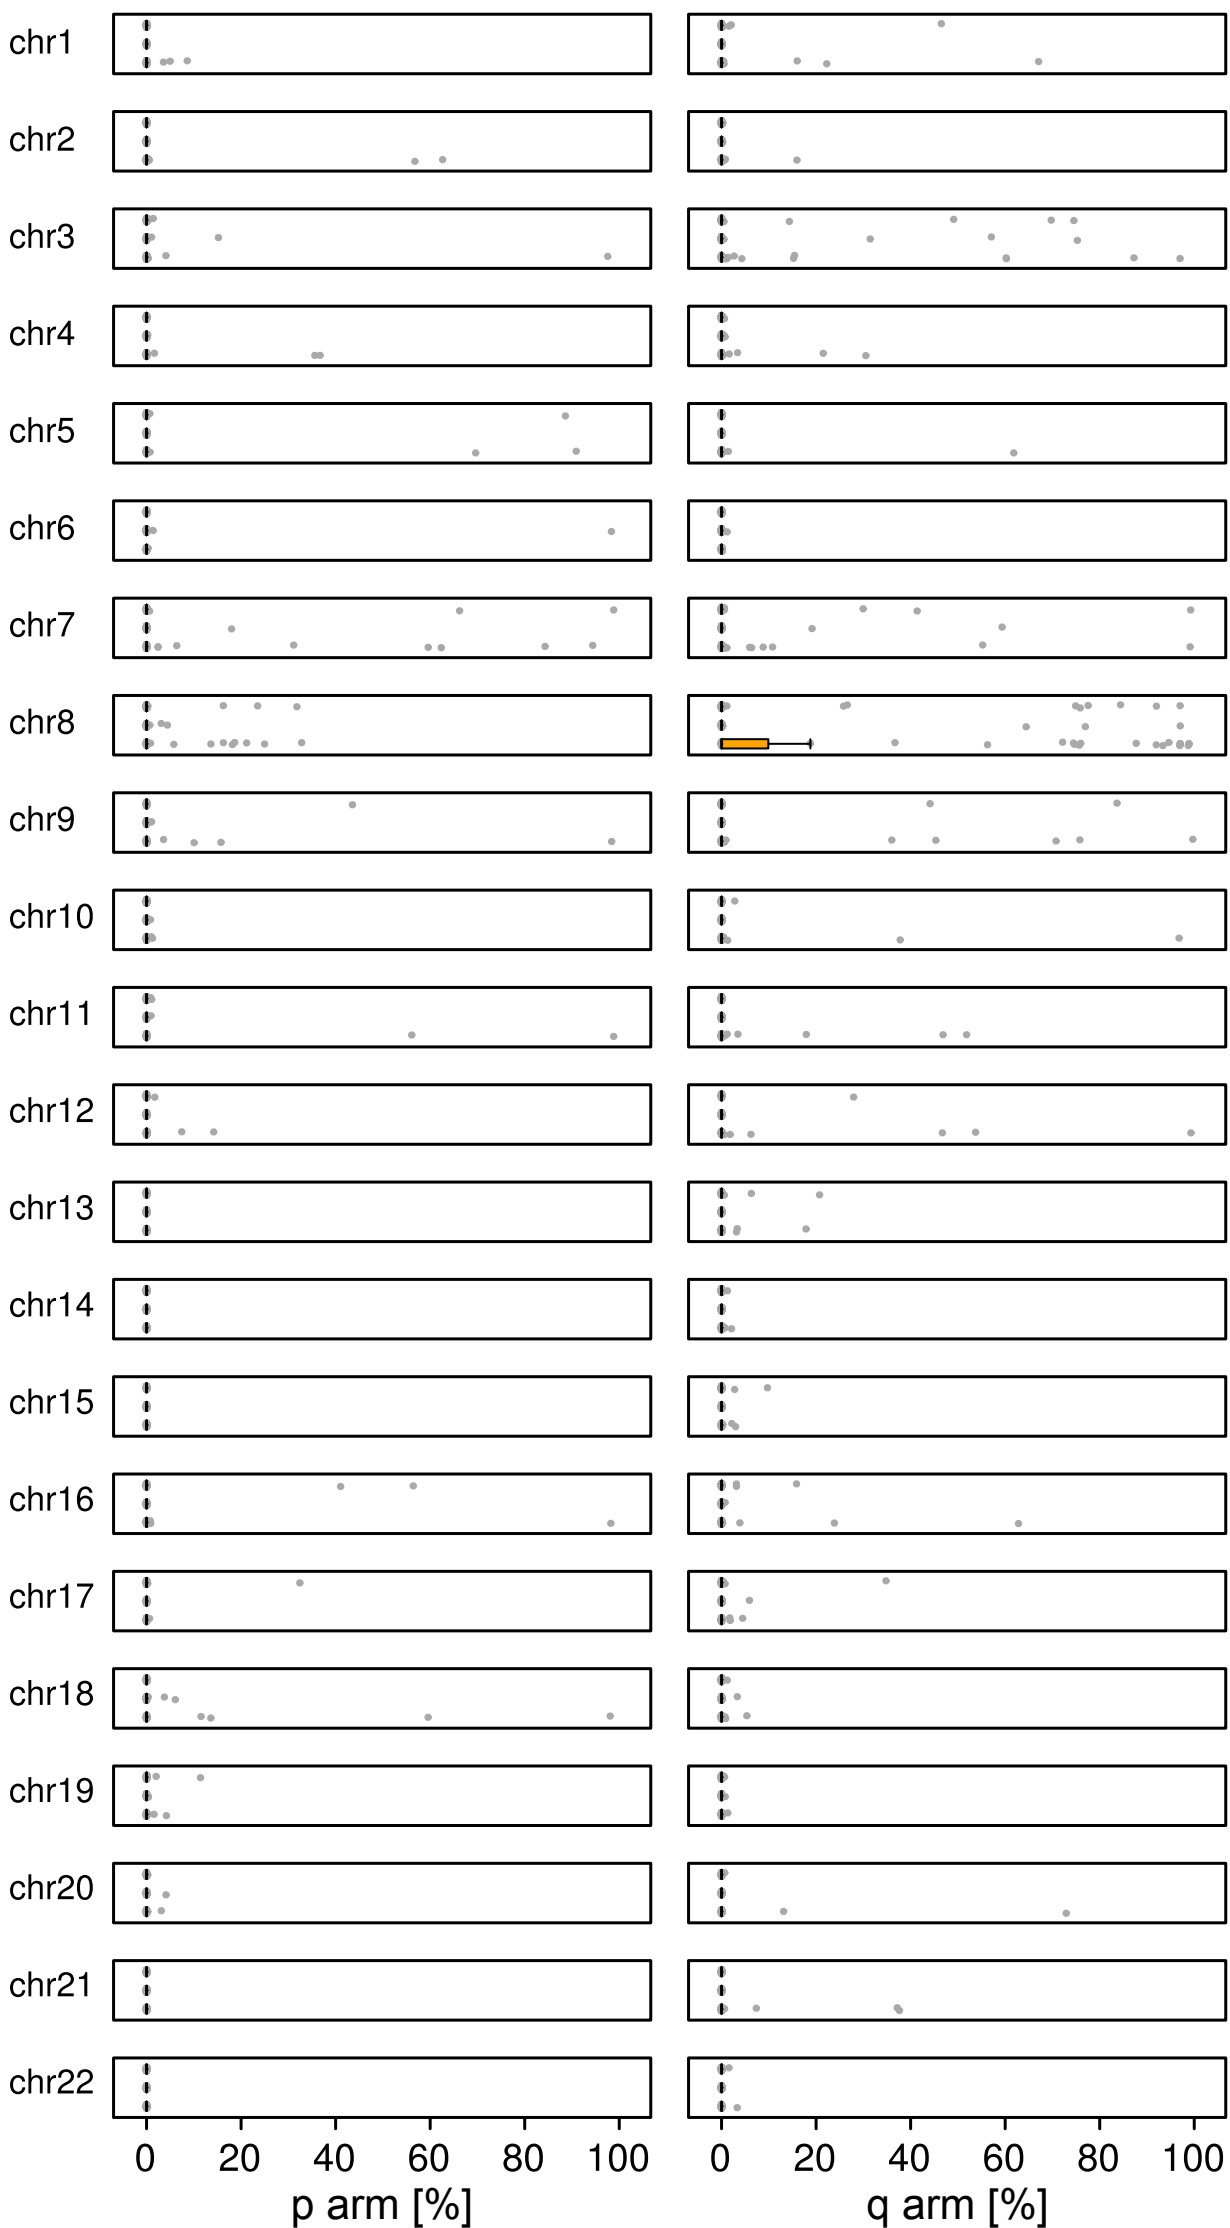

Supplementary Figure 4

CR/IDC category  
 non-CR/IDC GS7+  
 non-CR GS6  
 CR/IDC GS7+

### PGA per chromosome arm (deletions)

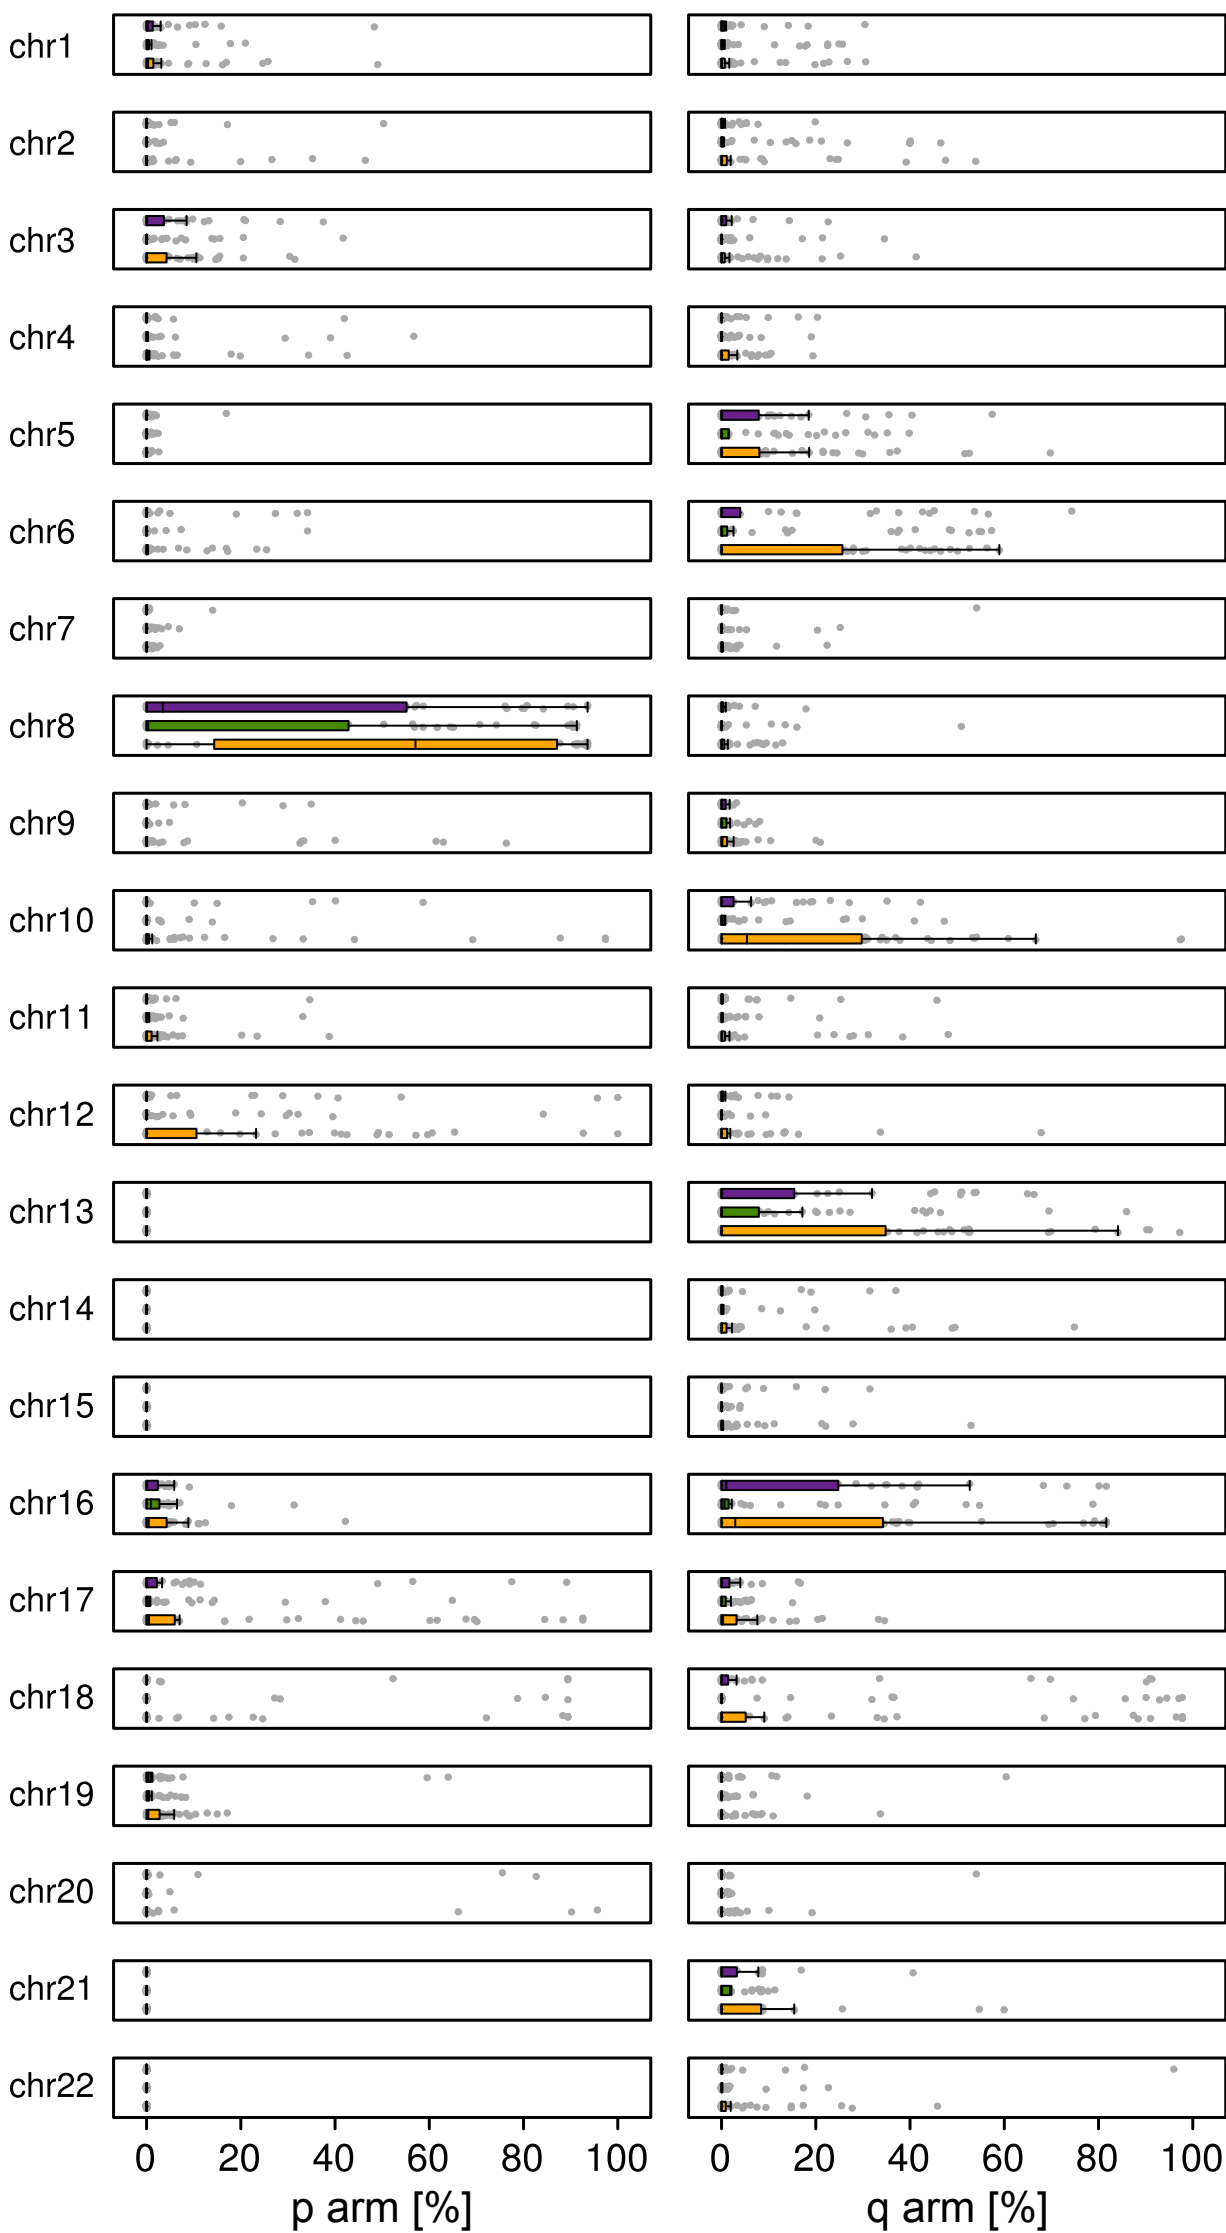

CR/IDC category  
 non-CR/IDC GS7+  
 non-CR GS6  
 CR/IDC GS7+

## PGA per chromosome arm (amplifications)

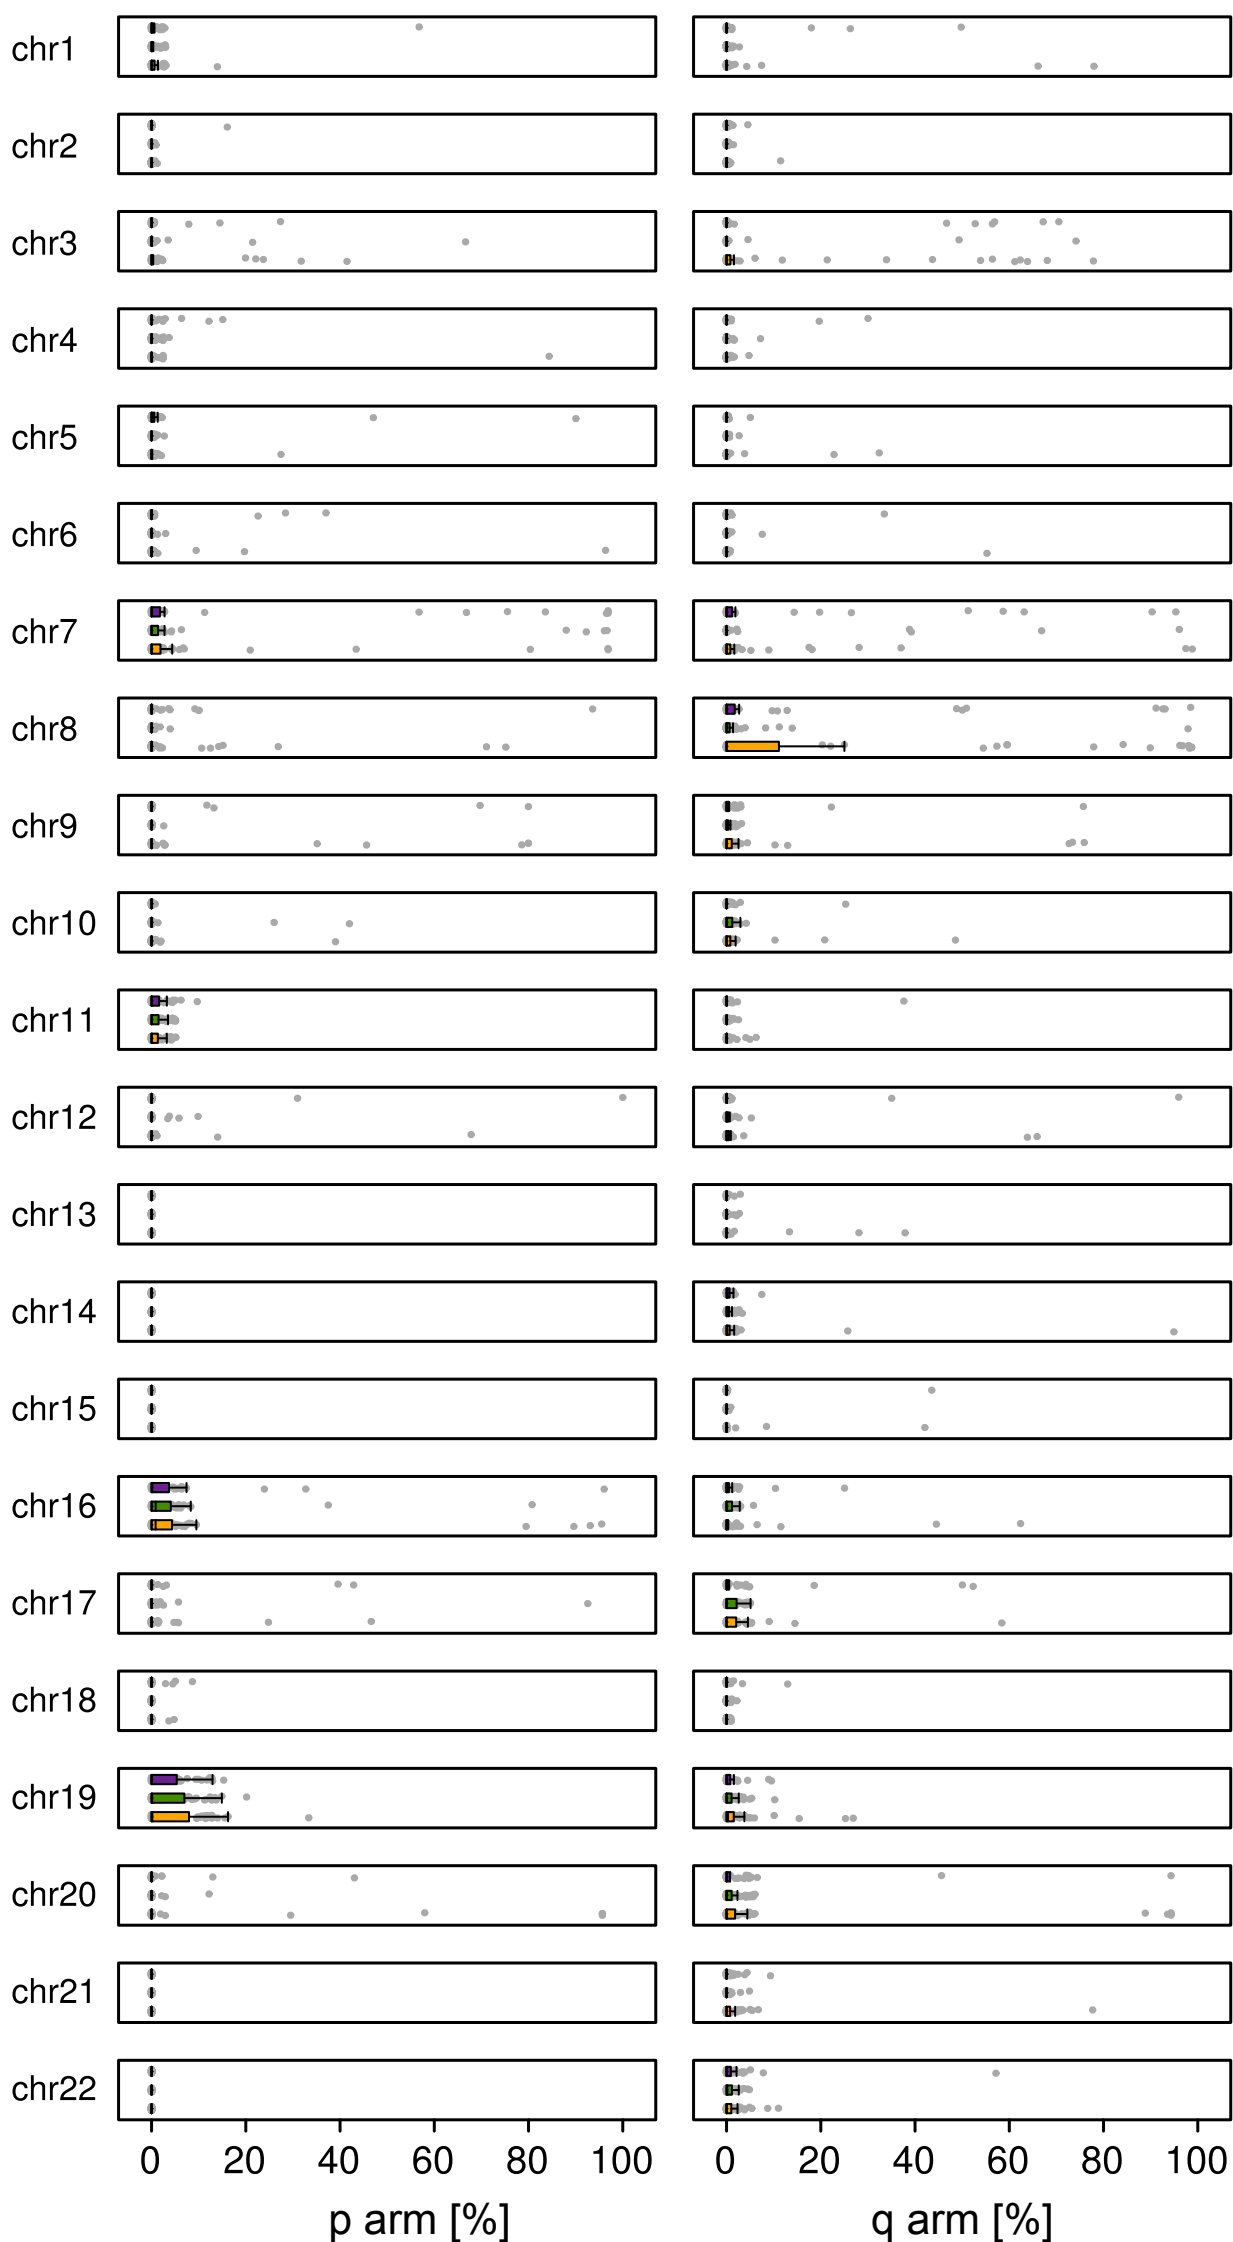

Supplementary Figure 6

A

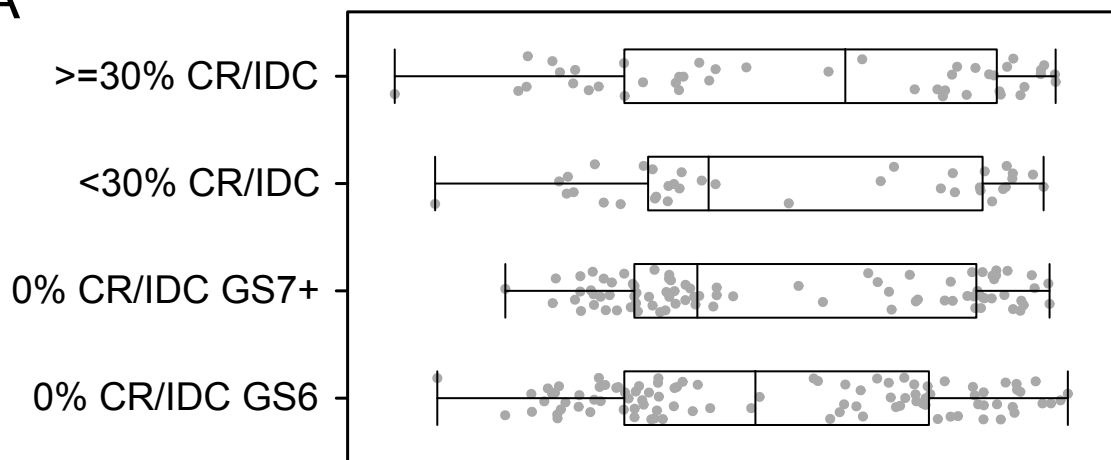

B

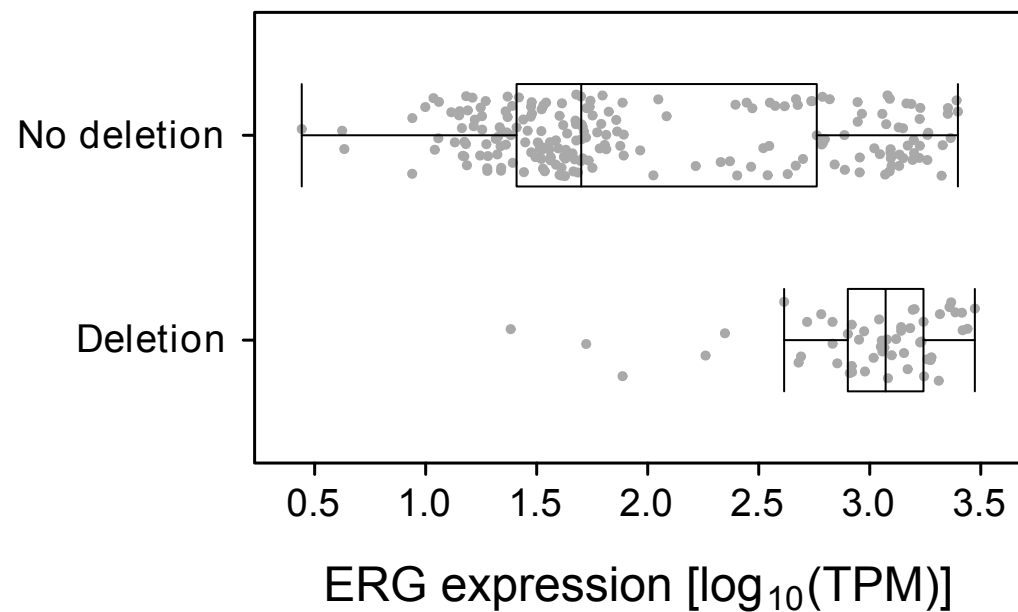

Supplement: 12885_2017_3976_MOESM1_ESM.pdf [file 12885_2017_3976_MOESM1_ESM.pdf]
