# Supplementary material for: Cribriform and intraductal prostate cancer are associated with increased genomic instability and distinct genomic alterations
Source: PubMed Central journal article supplement (PMC5751811; doi:10.1186/s12885-017-3976-z), 2018-01-02
Supplement: 12885_2017_3976_MOESM6_ESM.pdf [file 12885_2017_3976_MOESM6_ESM.pdf]

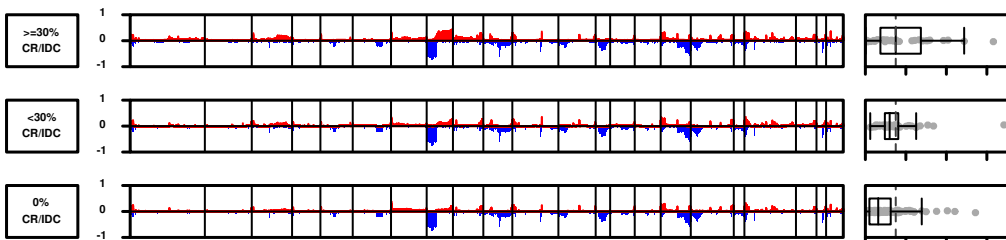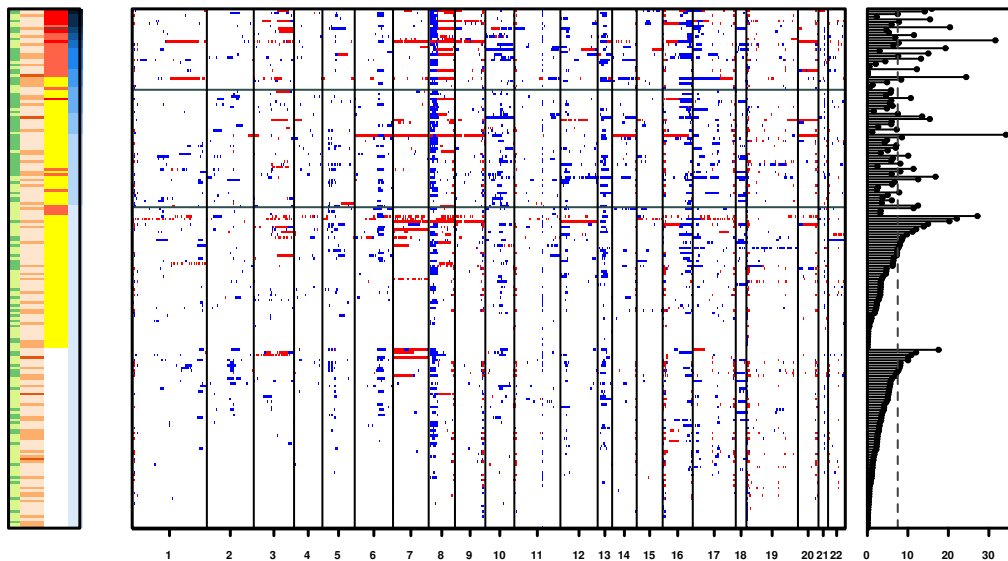

**T-Category**

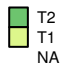

**PSA (ng/mL)**

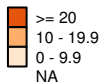

**Gleason Score**

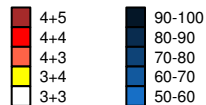

**% CR/IDC**

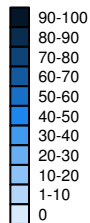

**Event**

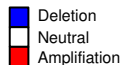

PGA [%]
