# Supplementary material for: Cribriform and intraductal prostate cancer are associated with increased genomic instability and distinct genomic alterations
Source: BMC Cancer. 2018 Jan 2;18:8. doi: 10.1186/s12885-017-3976-z (PMC5751811; doi:10.1186/s12885-017-3976-z)
Supplement: Supplementary file 5 — Gene-wise copy number alterations detected in the TCGA cohort and validated in the CPC-GENE cohort using a ≥ 30% CR/IDC threshold to stratify samples. Columns contain: Symbol – official gene symbol, Chromosome / Start / End – genomic coordinates of gene locus, FDR – Boschloo’s exact test p-value after correcting for multiple tests using the Benjamini–Hochberg procedure for specified dataset. amplifications_case – number of CR/IDC positive samples in specified dataset with an amplification spanning gene locus, amplifications_control – number of control samples in specified dataset with an amplification spanning gene locus, cases – total number of CR/IDC positive samples in specified dataset, controls – total number of control samples in specified dataset. All entries are sorted by genomic location. Deletions are presented in the same format and listed separately. (PDF 12328 kb) [file 12885_2017_3976_MOESM5_ESM.xls]

## Sheet: amplifications
Symbol	Chromosome	Start	End	FDR_TCGA	amplifications_case_TCGA	amplifications_control_TCGA	cases_TCGA	controls_TCGA	FDR_CPC-GENE	amplifications_case_CPC-GENE	amplifications_control_CPC-GENE	cases_CPC-GENE	controls_CPC-GENE
SULF1	8	70378858	70573147	0.00332697	12	6	44	84	0.0788376	9	6	31	54
PRDM14	8	70963885	70983562	0.0020492	13	6	44	84	0.0788376	9	6	31	54
NCOA2	8	71024266	71316020	0.0020492	13	6	44	84	0.0788376	9	6	31	54
TRAM1	8	71485452	71520694	0.0020492	13	6	44	84	0.0788376	9	6	31	54
LOC286190	8	71520811	71575513	0.0020492	13	6	44	84	0.0788376	9	6	31	54
LACTB2	8	71549500	71581447	0.0020492	13	6	44	84	0.0788376	9	6	31	54
XKR9	8	71581599	71648177	0.0020492	13	6	44	84	0.0788376	9	6	31	54
EYA1	8	72109667	72274467	0.0020492	13	6	44	84	0.0391291	9	4	31	54
MSC	8	72753776	72756731	0.00332697	12	6	44	84	0.0391291	9	4	31	54
LOC100132891	8	72755357	72968547	0.0020492	13	6	44	84	0.0391291	9	4	31	54
TRPA1	8	72933485	72987819	0.0020492	13	6	44	84	0.0391291	9	4	31	54
LOC392232	8	73117533	73163869	0.0020492	13	6	44	84	0.0391291	9	4	31	54
KCNB2	8	73449625	73850584	0.0020492	13	6	44	84	0.0391291	9	4	31	54
TERF1	8	73921096	73959987	0.00332697	12	6	44	84	0.0391291	9	4	31	54
SBSPON	8	73976777	74005507	0.00332697	12	6	44	84	0.0391291	9	4	31	54
LOC100130301	8	74153658	74171737	0.00332697	12	6	44	84	0.0391291	9	4	31	54
RPL7	8	74202873	74205869	0.00332697	12	6	44	84	0.0391291	9	4	31	54
RDH10	8	74206836	74237520	0.00332697	12	6	44	84	0.0391291	9	4	31	54
STAU2-AS1	8	74332308	74353753	0.00332697	12	6	44	84	0.0599203	8	4	31	54
STAU2	8	74332603	74659943	0.0020492	13	6	44	84	0.0391291	9	4	31	54
UBE2W	8	74692331	74791145	0.0020492	13	6	44	84	0.0391291	9	4	31	54
TCEB1	8	74857372	74884522	0.0020492	13	6	44	84	0.0391291	9	4	31	54
TMEM70	8	74888376	74895018	0.00332697	12	6	44	84	0.0391291	9	4	31	54
LY96	8	74903563	74941307	0.00332697	12	6	44	84	0.0391291	9	4	31	54
JPH1	8	75146938	75233562	0.00332697	12	6	44	84	0.0542338	9	5	31	54
GDAP1	8	75262617	75279335	0.00332697	12	6	44	84	0.0542338	9	5	31	54
MIR5681A	8	75460777	75460852	0.00332697	12	6	44	84	0.0788376	9	6	31	54
MIR5681B	8	75460784	75460844	0.00332697	12	6	44	84	0.0788376	9	6	31	54
FLJ39080	8	75512100	75670587	0.00332697	12	6	44	84	0.0788376	9	6	31	54
MIR2052	8	75617927	75617982	0.00332697	12	6	44	84	0.0788376	9	6	31	54
ZFHX4	8	77593514	77779521	0.00184466	13	5	44	84	0.0500824	10	6	31	54
PEX2	8	77892493	77913280	0.00184466	13	5	44	84	0.0709975	10	7	31	54
PKIA	8	79428335	79517502	0.0020492	13	6	44	84	0.0788376	9	6	31	54
ZC2HC1A	8	79578281	79631997	0.00332697	12	6	44	84	0.0788376	9	6	31	54
IL7	8	79645006	79717758	0.00332697	12	6	44	84	0.0788376	9	6	31	54
HEY1	8	80676244	80680098	0.0020492	13	6	44	84	0.0788376	9	6	31	54
MRPS28	8	80831094	80942506	0.0020492	13	6	44	84	0.0788376	9	6	31	54
TPD52	8	80947104	81083836	0.0020492	13	6	44	84	0.0788376	9	6	31	54
MIR5708	8	81153623	81153708	0.0020492	13	6	44	84	0.0788376	9	6	31	54
ZBTB10	8	81398447	81434610	0.0020492	13	6	44	84	0.0788376	9	6	31	54
ZNF704	8	81540685	81787016	0.0020492	13	6	44	84	0.0788376	9	6	31	54
PAG1	8	81880045	82024303	0.0020492	13	6	44	84	0.0788376	9	6	31	54
FABP5	8	82192717	82197012	0.0020492	13	6	44	84	0.0542338	9	5	31	54
PMP2	8	82352563	82359719	0.0020492	13	6	44	84	0.0542338	9	5	31	54
FABP9	8	82370617	82373758	0.0020492	13	6	44	84	0.0542338	9	5	31	54
FABP4	8	82390731	82395473	0.0020492	13	6	44	84	0.0542338	9	5	31	54
FABP12	8	82437280	82443550	0.0020492	13	6	44	84	0.0542338	9	5	31	54
IMPA1	8	82569150	82598589	0.0020492	13	6	44	84	0.0542338	9	5	31	54
SLC10A5	8	82605890	82607207	0.0020492	13	6	44	84	0.0542338	9	5	31	54
ZFAND1	8	82613565	82633539	0.0020492	13	6	44	84	0.0542338	9	5	31	54
CHMP4C	8	82644687	82671748	0.0020492	13	6	44	84	0.0542338	9	5	31	54
SNX16	8	82711817	82754521	0.0020492	13	6	44	84	0.0542338	9	5	31	54
LRRCC1	8	86019322	86058314	0.00680049	11	6	44	84	0.0788376	9	6	31	54
E2F5	8	86089618	86126753	0.00680049	11	6	44	84	0.0788376	9	6	31	54
C8orf59	8	86126287	86132643	0.00680049	11	6	44	84	0.0542338	9	5	31	54
CA13	8	86157715	86196302	0.00680049	11	6	44	84	0.0542338	9	5	31	54
CA1	8	86240457	86290342	0.00680049	11	6	44	84	0.0788376	9	6	31	54
DCAF4L2	8	88882970	88886296	0.0132726	11	7	44	84	0.0542338	9	5	31	54
MMP16	8	89049459	89339717	0.00652172	12	7	44	84	0.0391291	9	4	31	54
RIPK2	8	90769974	90803292	0.00652172	12	7	44	84	0.0391093	10	5	31	54
OSGIN2	8	90914095	90940095	0.00652172	12	7	44	84	0.0391093	10	5	31	54
NBN	8	90945563	90996899	0.00652172	12	7	44	84	0.0391093	10	5	31	54
DECR1	8	91013579	91064227	0.00652172	12	7	44	84	0.0391093	10	5	31	54
CALB1	8	91070837	91095107	0.00652172	12	7	44	84	0.0391093	11	5	31	54
LINC00534	8	91233715	91400187	0.00324047	13	7	44	84	0.0391093	11	5	31	54
TMEM64	8	91634222	91658133	0.0020492	13	6	44	84	0.0391093	11	5	31	54
NECAB1	8	91803920	91971630	0.00324047	13	7	44	84	0.0391093	11	5	31	54
LOC100127983	8	91970705	91997485	0.00324047	13	7	44	84	0.0391093	11	5	31	54
TMEM55A	8	92006501	92053203	0.00652172	12	7	44	84	0.0391093	11	5	31	54
OTUD6B	8	92082423	92099323	0.00324047	13	7	44	84	0.0391093	11	5	31	54
LRRC69	8	92114846	92231464	0.00652172	12	7	44	84	0.0391093	11	5	31	54
MIR4661	8	92217712	92217786	0.00652172	12	7	44	84	0.0391093	11	5	31	54
SLC26A7	8	92261515	92410378	0.00652172	12	7	44	84	0.0391093	11	6	31	54
RUNX1T1	8	92967194	93115454	0.00324047	13	7	44	84	0.0494681	11	7	31	54
FLJ46284	8	93725189	93798288	0.00324047	13	7	44	84	0.0500824	10	6	31	54
TRIQK	8	93895757	93978372	0.00324047	13	7	44	84	0.0391093	11	6	31	54
C8orf87	8	94146323	94179079	0.00324047	13	7	44	84	0.0391093	11	6	31	54
LINC00535	8	94358694	94712661	0.00324047	13	7	44	84	0.0500824	10	6	31	54
FAM92A1	8	94712772	94740671	0.00324047	13	7	44	84	0.0500824	10	6	31	54
RBM12B	8	94743730	94753224	0.00324047	13	7	44	84	0.0391093	10	5	31	54
RBM12B-AS1	8	94752338	94753047	0.00324047	13	7	44	84	0.0391093	10	5	31	54
TMEM67	8	94767071	94831460	0.00324047	13	7	44	84	0.0391093	10	5	31	54
MIR378D2	8	94928249	94928347	0.00324047	13	7	44	84	0.0391093	10	5	31	54
PDP1	8	94929082	94938296	0.00324047	13	7	44	84	0.0391093	10	5	31	54
CDH17	8	95139393	95229531	0.00324047	13	7	44	84	0.0391093	10	5	31	54
GEM	8	95261484	95274547	0.00324047	13	7	44	84	0.0391093	10	5	31	54
RAD54B	8	95384187	95487343	0.00324047	13	7	44	84	0.0391093	10	5	31	54
FSBP	8	95439939	95449180	0.00324047	13	7	44	84	0.0391093	10	5	31	54
KIAA1429	8	95500004	95565746	0.00324047	13	7	44	84	0.0391093	10	5	31	54
LOC100288748	8	95649512	95651695	0.00324047	13	7	44	84	0.0391093	10	5	31	54
ESRP1	8	95653363	95719694	0.00324047	13	7	44	84	0.0391093	10	5	31	54
DPY19L4	8	95732102	95806076	0.00324047	13	7	44	84	0.0391093	10	5	31	54
INTS8	8	95835533	95892721	0.00324047	13	7	44	84	0.0391093	10	5	31	54
CCNE2	8	95892452	95907482	0.00324047	13	7	44	84	0.0391093	10	5	31	54
TP53INP1	8	95938199	95961615	0.00324047	13	7	44	84	0.0391093	10	5	31	54
NDUFAF6	8	96037213	96070944	0.00324047	13	7	44	84	0.0391093	10	5	31	54
MIR3150B	8	96085138	96085224	0.00324047	13	7	44	84	0.0391093	11	5	31	54
MIR3150A	8	96085141	96085221	0.00324047	13	7	44	84	0.0391093	11	5	31	54
PLEKHF2	8	96145948	96168913	0.00324047	13	7	44	84	0.0391093	11	5	31	54
C8orf37	8	96257140	96281462	0.00324047	13	7	44	84	0.0391093	11	6	31	54
LOC100616530	8	96281063	96822371	0.00324047	13	7	44	84	0.0391093	11	6	31	54
LOC100500773	8	96959212	96960576	0.00324047	13	7	44	84	0.0391093	11	6	31	54
GDF6	8	97154557	97173020	0.00652172	12	7	44	84	0.0391093	11	6	31	54
UQCRB	8	97238903	97247862	0.00652172	12	7	44	84	0.0391093	11	5	31	54
PTDSS1	8	97274166	97346774	0.00652172	12	7	44	84	0.0391093	11	5	31	54
SDC2	8	97505881	97624037	0.00652172	12	7	44	84	0.0391093	11	6	31	54
CPQ	8	97657498	98155722	0.00652172	12	7	44	84	0.0391093	11	6	31	54
TSPYL5	8	98285713	98290176	0.00652172	12	7	44	84	0.0391093	11	6	31	54
MTDH	8	98656406	98742488	0.00652172	12	7	44	84	0.0500824	10	6	31	54
LAPTM4B	8	98787808	98864830	0.00652172	12	7	44	84	0.0391093	11	6	31	54
MATN2	8	98881310	99048946	0.00324047	13	7	44	84	0.0391093	11	6	31	54
RPL30	8	99053937	99057818	0.00324047	13	7	44	84	0.0391093	11	6	31	54
SNORA72	8	99054313	99054445	0.00324047	13	7	44	84	0.0391093	11	6	31	54
HRSP12	8	99114566	99129418	0.00324047	13	7	44	84	0.0391093	11	6	31	54
POP1	8	99129520	99172069	0.00324047	13	7	44	84	0.0391093	11	6	31	54
NIPAL2	8	99204386	99306621	0.00324047	13	7	44	84	0.0391093	11	6	31	54
KCNS2	8	99439249	99443023	0.00324047	13	7	44	84	0.0494681	11	7	31	54
STK3	8	99466858	99954799	0.00324047	13	7	44	84	0.0494681	11	7	31	54
OSR2	8	99956630	99964326	0.00652172	12	7	44	84	0.0494681	11	7	31	54
VPS13B	8	100025493	100889814	0.00324047	13	7	44	84	0.0658023	11	8	31	54
MIR599	8	100548863	100548958	0.00324047	13	7	44	84	0.0658023	11	8	31	54
MIR875	8	100549013	100549089	0.00324047	13	7	44	84	0.0658023	11	8	31	54
COX6C	8	100890222	100906242	0.00324047	13	7	44	84	0.0658023	11	8	31	54
RGS22	8	100973275	101118344	0.00324047	13	7	44	84	0.0494681	11	7	31	54
FBXO43	8	101145587	101158099	0.00324047	13	7	44	84	0.0494681	11	7	31	54
POLR2K	8	101162838	101166230	0.00324047	13	7	44	84	0.0494681	11	7	31	54
SPAG1	8	101170262	101254132	0.00324047	13	7	44	84	0.0494681	11	7	31	54
RNF19A	8	101269287	101322379	0.00324047	13	7	44	84	0.0391093	11	6	31	54
MIR4471	8	101394990	101395073	0.00324047	13	7	44	84	0.0391093	11	6	31	54
ANKRD46	8	101521979	101572014	0.00324047	13	7	44	84	0.0391093	11	6	31	54
SNX31	8	101585111	101661893	0.00324047	13	7	44	84	0.0391093	11	5	31	54
PABPC1	8	101715143	101734315	0.00324047	13	7	44	84	0.0391093	11	5	31	54
YWHAZ	8	101930803	101965623	0.00324047	13	7	44	84	0.0391093	11	5	31	54
FLJ42969	8	102064281	102088479	0.00324047	13	7	44	84	0.0391093	11	5	31	54
ZNF706	8	102209265	102218292	0.00324047	13	7	44	84	0.0391093	11	5	31	54
NACAP1	8	102381120	102381823	0.00324047	13	7	44	84	0.0391093	11	5	31	54
GRHL2	8	102504667	102681952	0.00324047	13	7	44	84	0.0391093	11	5	31	54
NCALD	8	102698769	103137135	0.00324047	13	7	44	84	0.0494681	11	7	31	54
MIR5680	8	103137659	103137743	0.00324047	13	7	44	84	0.0494681	11	7	31	54
RRM2B	8	103216728	103251346	0.00324047	13	7	44	84	0.0494681	11	7	31	54
UBR5	8	103264501	103424917	0.00324047	13	7	44	84	0.0494681	11	7	31	54
ODF1	8	103563847	103573245	0.00324047	13	7	44	84	0.0494681	11	7	31	54
KLF10	8	103661004	103667983	0.0020492	14	7	44	84	0.0494681	11	7	31	54
AZIN1	8	103838535	103876397	0.0020492	14	7	44	84	0.0494681	11	7	31	54
ATP6V1C1	8	104033247	104085285	0.00324047	13	7	44	84	0.0500824	10	6	31	54
BAALC	8	104152920	104242533	0.00324047	13	7	44	84	0.0500824	10	6	31	54
MIR3151	8	104166841	104166917	0.00324047	13	7	44	84	0.0500824	10	6	31	54
LOC100499183	8	104177736	104184368	0.00324047	13	7	44	84	0.0500824	10	6	31	54
FZD6	8	104310660	104345094	0.00324047	13	7	44	84	0.0500824	10	6	31	54
CTHRC1	8	104383742	104395232	0.0020492	14	7	44	84	0.0500824	10	6	31	54
SLC25A32	8	104410865	104427468	0.00324047	13	7	44	84	0.0500824	10	6	31	54
DCAF13	8	104426941	104455680	0.00324047	13	7	44	84	0.0500824	10	6	31	54
RIMS2	8	104512975	105266656	0.00324047	13	7	44	84	0.0391093	11	6	31	54
DCSTAMP	8	105352023	105368917	0.00324047	13	7	44	84	0.0391093	11	6	31	54
DPYS	8	105391651	105479277	0.00324047	13	7	44	84	0.0391093	11	6	31	54
LRP12	8	105501458	105601252	0.00652172	12	7	44	84	0.0391093	11	6	31	54
ZFPM2	8	106331146	106816767	0.00528588	13	8	44	84	0.0658023	11	8	31	54
OXR1	8	107282405	107764921	0.00324047	13	7	44	84	0.0658023	11	8	31	54
ABRA	8	107771710	107782472	0.00652172	12	7	44	84	0.0658023	11	8	31	54
ANGPT1	8	108261709	108510254	0.00324047	13	7	44	84	0.0658023	11	8	31	54
PKHD1L1	8	110374705	110543500	0.0020492	14	7	44	84	0.0709975	10	7	31	54
EBAG9	8	110551928	110577391	0.00324047	13	7	44	84	0.0709975	10	7	31	54
SYBU	8	110586404	110704020	0.00324047	13	7	44	84	0.0709975	10	7	31	54
CSMD3	8	113235158	114449242	0.0020492	14	7	44	84	0.0709975	10	7	31	54
TRPS1	8	116420723	116681228	0.00324047	13	7	44	84	0.0709975	10	7	31	54
LINC00536	8	116962735	117337297	0.00324047	13	7	44	84	0.0500824	10	6	31	54
EIF3H	8	117657054	117768062	0.0020492	14	7	44	84	0.0709975	10	7	31	54
UTP23	8	117778741	117786921	0.0020492	14	7	44	84	0.0709975	10	7	31	54
RAD21	8	117858172	117887105	0.0020492	14	7	44	84	0.0709975	10	7	31	54
RAD21-AS1	8	117886662	117889107	0.0020492	14	7	44	84	0.0709975	10	7	31	54
MIR3610	8	117886966	117887039	0.0020492	14	7	44	84	0.0709975	10	7	31	54
AARD	8	117950463	117956239	0.0020492	14	7	44	84	0.0709975	10	7	31	54
SLC30A8	8	117962511	118188953	0.00184466	14	6	44	84	0.0709975	10	7	31	54
MED30	8	118532964	118552501	0.0020492	13	6	44	84	0.0709975	10	7	31	54
EXT1	8	118811601	119124058	0.00184466	14	6	44	84	0.0709975	10	7	31	54
SAMD12	8	119201694	119634184	0.00324047	13	7	44	84	0.0494681	11	7	31	54
SAMD12-AS1	8	119633239	119738306	0.00324047	13	7	44	84	0.0494681	11	7	31	54
TNFRSF11B	8	119935795	119964383	0.0020492	14	7	44	84	0.0391093	11	6	31	54
COLEC10	8	120079423	120119202	0.0020492	14	7	44	84	0.0391093	11	6	31	54
MAL2	8	120220609	120257914	0.0020492	14	7	44	84	0.0391093	11	6	31	54
NOV	8	120428551	120436678	0.0020492	14	7	44	84	0.0391093	11	6	31	54
ENPP2	8	120569316	120651106	0.0020492	14	7	44	84	0.0391093	11	6	31	54
TAF2	8	120743013	120845074	0.0020492	14	7	44	84	0.0500824	10	6	31	54
DSCC1	8	120846180	120868170	0.0020492	14	7	44	84	0.0500824	10	6	31	54
DEPTOR	8	120885899	121063157	0.0020492	14	7	44	84	0.0500824	10	6	31	54
COL14A1	8	121137351	121384273	0.0020492	14	7	44	84	0.0500824	10	6	31	54
MRPL13	8	121408082	121457647	0.00324047	13	7	44	84	0.0500824	10	6	31	54
MTBP	8	121457637	121535875	0.00324047	13	7	44	84	0.0500824	10	6	31	54
SNTB1	8	121547984	121824309	0.00324047	13	7	44	84	0.0709975	10	7	31	54
HAS2	8	122625270	122653630	0.00324047	13	7	44	84	0.0494681	11	7	31	54
HAS2-AS1	8	122651585	122657564	0.00324047	13	7	44	84	0.0494681	11	7	31	54
ZHX2	8	123793900	123986755	0.0020492	14	7	44	84	0.0391093	11	5	31	54
DERL1	8	124025403	124054663	0.0020492	14	7	44	84	0.0391093	10	5	31	54
FAM83A	8	124194751	124222318	0.0020492	14	7	44	84	0.0391093	10	4	31	54
LOC100131726	8	124213411	124214983	0.0020492	14	7	44	84	0.0391093	10	4	31	54
MIR4663	8	124228027	124228103	0.0020492	14	7	44	84	0.0391093	10	3	31	54
C8orf76	8	124232195	124253638	0.0020492	14	7	44	84	0.0391093	10	3	31	54
ZHX1	8	124260689	124287781	0.0020492	14	7	44	84	0.0391093	10	3	31	54
ATAD2	8	124332090	124408705	0.0020492	14	7	44	84	0.0391093	10	3	31	54
WDYHV1	8	124428964	124454260	0.0020492	14	7	44	84	0.0391093	10	3	31	54
FBXO32	8	124510126	124553493	0.0020492	14	7	44	84	0.0391093	10	3	31	54
KLHL38	8	124657914	124665190	0.0020492	14	7	44	84	0.0391093	10	4	31	54
ANXA13	8	124693033	124749647	0.0020492	14	7	44	84	0.0391093	10	4	31	54
FAM91A1	8	124780881	124827690	0.0020492	14	7	44	84	0.0391093	10	4	31	54
FER1L6	8	124864226	125132302	0.0020492	14	7	44	84	0.0391093	10	4	31	54
FER1L6-AS1	8	124996377	125053023	0.0020492	14	7	44	84	0.0391093	10	4	31	54
TMEM65	8	125323158	125384940	0.0020492	14	7	44	84	0.0391093	11	4	31	54
TRMT12	8	125463047	125465266	0.0020492	14	7	44	84	0.0391093	11	4	31	54
RNF139	8	125487007	125500859	0.0020492	14	7	44	84	0.0391093	11	4	31	54
TATDN1	8	125500734	125551329	0.0020492	14	7	44	84	0.0391093	11	5	31	54
NDUFB9	8	125551342	125562227	0.0020492	14	7	44	84	0.0391093	11	5	31	54
MTSS1	8	125563027	125740730	0.0020492	14	7	44	84	0.0391093	11	5	31	54
LOC157381	8	125954249	125963337	0.0020492	14	7	44	84	0.0391093	11	5	31	54
ZNF572	8	125985538	125991630	0.0020492	14	7	44	84	0.0391093	11	5	31	54
SQLE	8	126010719	126034525	0.0020492	14	7	44	84	0.0391093	11	5	31	54
KIAA0196	8	126036502	126104061	0.0020492	14	7	44	84	0.0391093	11	5	31	54
NSMCE2	8	126104082	126379367	0.0020492	14	7	44	84	0.0391093	11	5	31	54
TRIB1	8	126442562	126450644	0.0020492	14	7	44	84	0.0391093	11	5	31	54
LOC100130231	8	126934766	126963441	0.0020492	14	7	44	84	0.0391093	11	6	31	54
FAM84B	8	127564682	127570711	0.0020492	14	7	44	84	0.0391093	11	5	31	54
PCAT1	8	128025398	128033259	0.0020492	14	7	44	84	0.0391093	11	5	31	54
POU5F1B	8	128427856	128429441	0.0020492	14	7	44	84	0.0391093	11	5	31	54
LOC727677	8	128455594	128494384	0.0020492	14	7	44	84	0.0391093	11	5	31	54
MYC	8	128748314	128753680	0.0020492	14	7	44	84	0.0391093	11	5	31	54
MIR1204	8	128808207	128808274	0.0020492	14	7	44	84	0.0494681	11	7	31	54
PVT1	8	128902873	129113499	0.0020492	14	7	44	84	0.0494681	11	7	31	54
MIR1205	8	128972878	128972941	0.0020492	14	7	44	84	0.0494681	11	7	31	54
MIR1206	8	129021143	129021202	0.0020492	14	7	44	84	0.0494681	11	7	31	54
MIR1207	8	129061397	129061484	0.0020492	14	7	44	84	0.0494681	11	7	31	54
MIR1208	8	129162361	129162434	0.0020492	14	7	44	84	0.0494681	11	7	31	54
LOC728724	8	130228712	130253486	0.00324047	13	7	44	84	0.0932534	11	9	31	54
GSDMC	8	130760441	130799134	0.0020492	14	7	44	84	0.0494681	11	7	31	54
FAM49B	8	130851838	131028897	0.0020492	14	7	44	84	0.0494681	11	7	31	54
MIR5194	8	131020579	131020699	0.0020492	14	7	44	84	0.0391093	11	6	31	54
ASAP1	8	131064350	131455906	0.00184466	14	6	44	84	0.0494681	11	7	31	54
LOC100507117	8	131094983	131097014	0.00184466	14	6	44	84	0.0391093	11	6	31	54
ASAP1-IT1	8	131307600	131308779	0.00184466	14	6	44	84	0.0391093	11	6	31	54
ADCY8	8	131792546	132052835	0.0020492	13	6	44	84	0.0494681	11	7	31	54
EFR3A	8	132916355	133025886	0.00184466	14	6	44	84	0.0494681	11	7	31	54
OC90	8	133036466	133071627	0.0020492	13	6	44	84	0.0494681	11	7	31	54
HHLA1	8	133073732	133117512	0.0020492	13	6	44	84	0.0494681	11	7	31	54
KCNQ3	8	133133104	133493004	0.00184466	14	6	44	84	0.0494681	11	7	31	54
HPYR1	8	133572744	133573726	0.0020492	14	7	44	84	0.0709975	10	7	31	54
LRRC6	8	133584446	133687813	0.0020492	14	7	44	84	0.0709975	10	7	31	54
TMEM71	8	133722191	133772914	0.0020492	14	7	44	84	0.0709975	10	7	31	54
PHF20L1	8	133787603	133861052	0.0020492	14	7	44	84	0.0709975	10	7	31	54
TG	8	133879204	134147143	0.0020492	14	7	44	84	0.0709975	10	7	31	54
SLA	8	134048972	134115310	0.0020492	14	7	44	84	0.0709975	10	7	31	54
WISP1	8	134203281	134243932	0.0020492	14	7	44	84	0.0709975	10	7	31	54
NDRG1	8	134249413	134309547	0.0020492	14	7	44	84	0.0709975	10	7	31	54
ST3GAL1	8	134467090	134584183	0.0020492	14	7	44	84	0.0500824	10	6	31	54
ZFAT	8	135490030	135725292	0.00184466	14	6	44	84	0.0500824	10	6	31	54
ZFAT-AS1	8	135610313	135612932	0.00184466	14	6	44	84	0.0500824	10	6	31	54
MIR30B	8	135812762	135812850	0.0020492	14	7	44	84	0.0500824	10	6	31	54
MIR30D	8	135817118	135817188	0.0020492	14	7	44	84	0.0500824	10	6	31	54
LOC286094	8	136246373	136311962	0.00184466	14	6	44	84	0.0500824	10	6	31	54
KHDRBS3	8	136469715	136659848	0.0020492	14	7	44	84	0.0391093	11	6	31	54
FAM135B	8	139142265	139509065	0.0012461	13	4	44	84	0.0500824	10	6	31	54
COL22A1	8	139600477	139926236	0.0012461	13	4	44	84	0.0500824	10	6	31	54
KCNK9	8	140624803	140715299	0.00118134	15	5	44	84	0.0709975	10	7	31	54
TRAPPC9	8	140742585	141468678	0.00118134	15	5	44	84	0.0709975	10	7	31	54
CHRAC1	8	141521396	141527252	0.00118134	15	5	44	84	0.0391093	10	5	31	54
PTK2	8	141668480	142011412	0.00118134	15	5	44	84	0.0391093	10	5	31	54
DENND3	8	142138719	142205900	0.00118134	15	5	44	84	0.0391093	10	5	31	54
SLC45A4	8	142220869	142238673	0.00118134	15	5	44	84	0.0391093	10	5	31	54
LOC731779	8	142350647	142354720	0.00118134	15	4	44	84	0.0391093	10	3	31	54
GPR20	8	142366586	142377365	0.00118134	15	4	44	84	0.0391093	9	3	31	54
PTP4A3	8	142432006	142441620	0.00118134	15	4	44	84	0.0391093	9	2	31	54
MIR4472-1	8	143257699	143257779	0.00118134	14	4	44	84	0.0391093	11	5	31	54
LINC00051	8	143279716	143290364	0.00118134	14	4	44	84	0.0391093	11	6	31	54
TSNARE1	8	143293440	143484543	0.00118134	14	4	44	84	0.0658023	11	8	31	54
BAI1	8	143545376	143626368	0.00118134	14	4	44	84	0.0658023	11	8	31	54
ARC	8	143692404	143695833	0.00118134	14	4	44	84	0.0500824	10	6	31	54
PSCA	8	143751725	143764145	0.0012461	13	4	44	84	0.0391093	12	7	31	54
LY6K	8	143781528	143785584	0.0012461	13	4	44	84	0.0391093	11	6	31	54
LOC100288181	8	143783669	143808391	0.0012461	13	4	44	84	0.0391093	11	6	31	54
THEM6	8	143808620	143818350	0.0012461	13	4	44	84	0.0391093	11	6	31	54
SLURP1	8	143822361	143823829	0.0012461	13	4	44	84	0.0391093	11	6	31	54
LYPD2	8	143831627	143833952	0.0012461	13	4	44	84	0.0391093	11	6	31	54
LYNX1	8	143845755	143859640	0.0012461	13	4	44	84	0.0391093	11	6	31	54
LY6D	8	143866297	143868008	0.0012461	13	4	44	84	0.0391093	11	6	31	54
GML	8	143916216	143928262	0.0012461	13	4	44	84	0.0391093	10	5	31	54
CYP11B1	8	143953772	143961236	0.0012461	13	4	44	84	0.0391093	10	5	31	54
CYP11B2	8	143991974	143999259	0.0012461	13	4	44	84	0.0391093	10	5	31	54
LOC100133669	8	144063447	144099807	0.0012461	13	4	44	84	0.0391093	10	5	31	54
LY6E	8	144099901	144103827	0.0012461	13	4	44	84	0.0391093	10	5	31	54
C8orf31	8	144120678	144135720	0.0012461	13	4	44	84	0.0391093	10	5	31	54
LY6H	8	144239330	144242053	0.0012461	14	5	44	84	0.0500824	10	6	31	54
GPIHBP1	8	144295067	144299044	0.00118134	15	5	44	84	0.0658023	11	8	31	54
ZFP41	8	144328990	144344875	0.0012461	15	6	44	84	0.0609608	12	9	31	54
GLI4	8	144349606	144359101	0.0012461	15	6	44	84	0.0494681	12	8	31	54
ZNF696	8	144373558	144382120	0.0012461	15	6	44	84	0.0494681	12	8	31	54
TOP1MT	8	144391496	144442147	0.0012461	15	6	44	84	0.0494681	12	8	31	54
RHPN1-AS1	8	144448792	144450805	0.0012461	15	6	44	84	0.0494681	12	8	31	54
RHPN1	8	144451024	144466390	0.0012461	15	6	44	84	0.0494681	12	8	31	54
MAFA	8	144510229	144512602	0.00118134	15	5	44	84	0.0391093	12	7	31	54
ZC3H3	8	144519824	144623620	0.0012461	15	6	44	84	0.0391093	12	7	31	54
GSDMD	8	144635556	144645231	0.0012461	14	5	44	84	0.0391093	12	7	31	54
EEF1D	8	144661866	144679845	0.0012461	14	5	44	84	0.0391093	12	7	31	54
TIGD5	8	144680073	144682485	0.0012461	14	5	44	84	0.0391093	12	7	31	54
PYCRL	8	144686082	144691784	0.0012461	14	5	44	84	0.0391093	12	7	31	54
TSTA3	8	144694787	144699732	0.0020492	12	5	44	84	0.0391093	12	7	31	54
ZNF623	8	144718182	144735900	0.0020492	12	5	44	84	0.0709975	10	7	31	54
ZNF707	8	144766621	144777555	0.0020492	12	5	44	84	0.0709975	10	7	31	54
BREA2	8	144779284	144780583	0.0020492	12	5	44	84	0.0709975	10	7	31	54
CCDC166	8	144788863	144790279	0.0020492	12	5	44	84	0.0709975	10	7	31	54
MAPK15	8	144798506	144804633	0.0020492	12	5	44	84	0.0709975	10	7	31	54
FAM83H	8	144806102	144815914	0.0020492	12	5	44	84	0.0709975	10	7	31	54
MIR4664	8	144815252	144815323	0.0020492	12	5	44	84	0.0709975	10	7	31	54
LOC100128338	8	144816309	144828507	0.0020492	12	5	44	84	0.0709975	10	7	31	54
SCRIB	8	144873089	144897549	0.0020492	12	5	44	84	0.0658023	11	8	31	54
MIR937	8	144895126	144895212	0.0020492	12	5	44	84	0.0658023	11	8	31	54
PUF60	8	144898513	144911556	0.0020492	12	5	44	84	0.0658023	11	8	31	54
NRBP2	8	144915754	144923146	0.0020492	12	5	44	84	0.0658023	11	8	31	54
EPPK1	8	144939911	144947434	0.0020492	12	5	44	84	0.0658023	11	8	31	54
PARP10	8	145051319	145060635	0.0020492	12	5	44	84	0.097828	13	12	31	54
GRINA	8	145064225	145067583	0.0020492	12	5	44	84	0.097828	13	12	31	54
SPATC1	8	145086581	145102015	0.0020492	12	5	44	84	0.097828	13	12	31	54
OPLAH	8	145106166	145115584	0.0020492	12	5	44	84	0.097828	13	12	31	54
EXOSC4	8	145133521	145135551	0.0020492	12	5	44	84	0.097828	13	12	31	54
GPAA1	8	145137523	145141119	0.0020492	12	5	44	84	0.097828	13	12	31	54
CYC1	8	145149959	145152428	0.0020492	12	5	44	84	0.097828	13	12	31	54
SHARPIN	8	145153535	145159140	0.0020492	12	5	44	84	0.097828	13	12	31	54
MAF1	8	145159304	145162515	0.0020492	12	5	44	84	0.097828	13	12	31	54
KIAA1875	8	145162628	145173218	0.0020492	12	5	44	84	0.097828	13	12	31	54
BOP1	8	145486055	145515120	0.0020492	12	5	44	84	0.097828	13	12	31	54
HSF1	8	145515269	145538385	0.0020492	12	5	44	84	0.0709975	13	11	31	54
ZNF16	8	146155743	146176274	0.0020492	12	5	44	84	0.0500824	10	6	31	54

## Sheet: deletions
Symbol	Chromosome	Start	End	FDR_TCGA	deletions_case_TCGA	deletions_control_TCGA	cases_TCGA	controls_TCGA	FDR_CPC-GENE	deletions_case_CPC-GENE	deletions_control_CPC-GENE	cases_CPC-GENE	controls_CPC-GENE
OR4F21	8	116085	117024	0.000808426	15	6	44	84	0.0169639	15	10	31	54
RPL23AP53	8	158344	182318	0.00893325	19	17	44	84	0.0169639	15	10	31	54
ZNF596	8	182199	197339	0.0075211	20	18	44	84	0.0169639	15	10	31	54
FBXO25	8	356807	419875	0.0075211	20	18	44	84	0.0169639	15	10	31	54
ERICH1	8	614199	681226	0.00255948	22	18	44	84	0.0285826	15	11	31	54
LOC286083	8	1244293	1250827	0.00385216	22	19	44	84	0.0143225	16	11	31	54
DLGAP2	8	1449568	1656642	0.00385216	22	19	44	84	0.0143225	16	11	31	54
CLN8	8	1711869	1734736	0.00385216	22	19	44	84	0.0143225	16	11	31	54
MIR596	8	1765396	1765473	0.00385216	22	19	44	84	0.0143225	16	11	31	54
ARHGEF10	8	1772148	1906807	0.00385216	22	19	44	84	0.0143225	16	11	31	54
KBTBD11	8	1922043	1955109	0.00385216	22	19	44	84	0.0143225	16	11	31	54
MYOM2	8	1993157	2093380	0.00385216	22	19	44	84	0.0129596	17	12	31	54
CSMD1	8	2792874	4852328	0.00311234	21	17	44	84	0.0154945	18	14	31	54
LOC100287015	8	6261076	6264069	0.0170843	19	19	44	84	0.00676535	19	13	31	54
MCPH1	8	6264112	6501140	0.0103639	20	19	44	84	0.00676535	19	13	31	54
ANGPT2	8	6357174	6420784	0.0103639	20	19	44	84	0.00676535	19	13	31	54
AGPAT5	8	6565877	6619021	0.0103639	20	19	44	84	0.00676535	19	13	31	54
MIR4659A	8	6602684	6602765	0.0103639	20	19	44	84	0.00442087	19	12	31	54
MIR4659B	8	6602688	6602761	0.0103639	20	19	44	84	0.00442087	19	12	31	54
XKR5	8	6666040	6693166	0.0103639	20	19	44	84	0.00442087	19	12	31	54
LOC100652791	8	6693075	6699975	0.0103639	20	19	44	84	0.00442087	19	12	31	54
DEFB1	8	6728096	6735529	0.00670063	21	19	44	84	0.00442087	19	12	31	54
DEFA6	8	6782215	6783598	0.00670063	21	19	44	84	0.00442087	19	12	31	54
DEFA4	8	6793344	6795786	0.00670063	21	19	44	84	0.00442087	19	12	31	54
DEFA10P	8	6825662	6826635	0.0075211	20	18	44	84	0.00442087	19	12	31	54
DEFA1	8	6835170	6875823	0.00893325	21	20	44	84	0.00442087	19	12	31	54
DEFA1B	8	6835170	6875823	0.00893325	21	20	44	84	0.00442087	19	12	31	54
DEFT1P	8	6844699	6866346	0.00893325	21	20	44	84	0.00442087	19	12	31	54
DEFT1P2	8	6844699	6866346	0.00893325	21	20	44	84	0.00442087	19	12	31	54
DEFA3	8	6873390	6875816	0.0103639	20	19	44	84	0.00442087	19	12	31	54
DEFA5	8	6912828	6914259	0.0075211	20	18	44	84	0.00442087	19	12	31	54
FAM86B3P	8	8086091	8102387	0.0206873	18	18	44	84	0.0394786	18	17	31	54
SGK223	8	8175257	8239257	0.00155429	23	18	44	84	0.0394786	18	17	31	54
CLDN23	8	8559665	8561617	0.00201478	23	19	44	84	0.0262244	19	17	31	54
MFHAS1	8	8641998	8751131	0.00201478	23	19	44	84	0.0367932	19	18	31	54
ERI1	8	8860313	8890849	0.00201478	23	19	44	84	0.0367932	19	18	31	54
MIR4660	8	8905954	8906028	0.00201478	23	19	44	84	0.0367932	19	18	31	54
PPP1R3B	8	8993763	9009152	0.00201478	23	19	44	84	0.0367932	19	18	31	54
LOC157273	8	9182560	9192590	0.00201478	23	19	44	84	0.0367932	19	18	31	54
TNKS	8	9413444	9639856	0.00201478	23	19	44	84	0.0367932	19	18	31	54
MIR597	8	9599181	9599278	0.00201478	23	19	44	84	0.0367932	19	18	31	54
LINC00599	8	9757573	9760839	0.00103698	24	19	44	84	0.0327442	18	16	31	54
MIR124-1	8	9760897	9760982	0.00103698	24	19	44	84	0.0327442	18	16	31	54
MSRA	8	9911829	10286401	0.000313394	26	19	44	84	0.0193809	19	16	31	54
PRSS55	8	10383055	10411676	0.000313394	26	19	44	84	0.0115471	19	14	31	54
RP1L1	8	10463859	10512617	0.000313394	26	19	44	84	0.0115471	19	14	31	54
C8orf74	8	10530146	10558103	0.000313394	26	19	44	84	0.0129596	19	15	31	54
SOX7	8	10581277	10588022	0.000313394	26	19	44	84	0.0129596	19	15	31	54
PINX1	8	10622883	10697299	0.000313394	26	19	44	84	0.0129596	19	15	31	54
MIR1322	8	10682882	10682953	0.000313394	26	19	44	84	0.0129596	19	15	31	54
XKR6	8	10753656	11058875	0.000313394	26	19	44	84	0.00971985	20	15	31	54
MIR598	8	10892715	10892812	0.000313394	26	19	44	84	0.00585486	20	14	31	54
MTMR9	8	11141999	11185654	0.000313394	26	19	44	84	0.00408272	20	13	31	54
SLC35G5	8	11188494	11189695	0.000313394	26	19	44	84	0.00408272	20	13	31	54
TDH	8	11197145	11225961	0.000313394	26	19	44	84	0.00408272	20	13	31	54
FAM167A	8	11278972	11324276	0.000313394	26	19	44	84	0.00408272	20	13	31	54
BLK	8	11351520	11422108	0.000313394	26	19	44	84	0.00676535	19	13	31	54
LINC00208	8	11434043	11438850	0.000313394	26	19	44	84	0.00676535	19	13	31	54
GATA4	8	11561716	11617509	0.000313394	26	19	44	84	0.00676535	19	13	31	54
NEIL2	8	11627171	11644854	0.000313394	26	19	44	84	0.0115471	19	14	31	54
FDFT1	8	11660189	11696818	0.000313394	26	19	44	84	0.0115471	19	14	31	54
CTSB	8	11700033	11725646	0.000313394	26	19	44	84	0.0115471	19	14	31	54
DEFB136	8	11831445	11832108	0.000313394	26	19	44	84	0.0129596	19	15	31	54
DEFB135	8	11839829	11842099	0.000605666	25	19	44	84	0.0129596	19	15	31	54
DEFB134	8	11851488	11853760	0.000808426	24	18	44	84	0.0129596	19	15	31	54
DEFB130	8	11921897	12175825	0.00793697	18	15	44	84	0.0129596	19	15	31	54
LOC100133267	8	11921897	12175825	0.00793697	18	15	44	84	0.0129596	19	15	31	54
ZNF705D	8	11946846	11973025	0.00451781	21	18	44	84	0.0129596	19	15	31	54
FAM66D	8	11973290	12008698	0.0114501	21	21	44	84	0.0129596	19	15	31	54
LOC392196	8	11985366	11986806	0.00703864	19	16	44	84	0.0129596	19	15	31	54
USP17L7	8	11989925	11991518	0.0114501	21	21	44	84	0.0129596	19	15	31	54
USP17L2	8	11994676	11996269	0.0103639	20	19	44	84	0.0129596	19	15	31	54
FAM90A2P	8	12030962	12034776	0.0312698	17	18	44	84	0.0129596	19	15	31	54
FAM86B1	8	12039612	12051624	0.032432	15	15	44	84	0.0129596	19	15	31	54
FAM86B2	8	12283123	12293852	0.0312698	17	18	44	84	0.0129596	19	15	31	54
LOC100506990	8	12294521	12424354	0.0381253	14	14	44	84	0.0129596	19	15	31	54
LOC729732	8	12394587	12523120	0.021635	16	15	44	84	0.0129596	19	15	31	54
LONRF1	8	12579405	12612992	0.000149747	27	19	44	84	0.0129596	19	15	31	54
MIR3926-1	8	12584740	12584813	0.000149747	27	19	44	84	0.0129596	19	15	31	54
MIR3926-2	8	12584745	12584808	0.000149747	27	19	44	84	0.0129596	19	15	31	54
LOC340357	8	12623570	12668910	0.000231598	27	20	44	84	0.0213491	18	15	31	54
KIAA1456	8	12803182	12887284	0.000149747	27	19	44	84	0.0193809	19	16	31	54
DLC1	8	12940871	13372429	0.000149747	27	19	44	84	0.0193809	19	16	31	54
C8orf48	8	13424351	13425797	0.000313394	26	19	44	84	0.0193809	19	16	31	54
SGCZ	8	13947372	15095792	8.24503e-05	27	17	44	84	0.0193809	19	16	31	54
MIR383	8	14710946	14711019	7.68016e-05	28	17	44	84	0.0193809	19	16	31	54
TUSC3	8	15397595	15624158	0.000149747	27	19	44	84	0.0193809	19	16	31	54
MSR1	8	15965386	16050300	0.000149747	27	19	44	84	0.0193809	19	16	31	54
FGF20	8	16850333	16859674	0.000149747	27	19	44	84	0.0367932	19	18	31	54
ZDHHC2	8	17013835	17080241	0.000231598	27	20	44	84	0.0367932	19	18	31	54
CNOT7	8	17086739	17104387	0.000231598	27	20	44	84	0.0367932	19	18	31	54
VPS37A	8	17104400	17155533	0.000231598	27	20	44	84	0.0367932	19	18	31	54
MTMR7	8	17154305	17271040	0.000231598	27	20	44	84	0.0367932	19	18	31	54
SLC7A2	8	17354596	17428077	0.000139926	28	20	44	84	0.0197499	20	18	31	54
PDGFRL	8	17433941	17500642	0.000139926	28	20	44	84	0.0197499	20	18	31	54
MTUS1	8	17501302	17658426	8.24503e-05	29	20	44	84	0.0298268	20	19	31	54
FGL1	8	17721899	17753047	8.24503e-05	29	20	44	84	0.0298268	20	19	31	54
PCM1	8	17780365	17887457	8.24503e-05	29	20	44	84	0.0298268	20	19	31	54
ASAH1	8	17913924	17942507	8.24503e-05	29	20	44	84	0.0229283	21	20	31	54
NAT1	8	18027970	18081198	7.68016e-05	29	19	44	84	0.0169514	22	21	31	54
NAT2	8	18248754	18258723	8.24503e-05	29	20	44	84	0.0236373	22	22	31	54
PSD3	8	18384812	18871196	8.24503e-05	29	20	44	84	0.0327442	22	23	31	54
LOC100128993	8	19041185	19103032	7.68016e-05	30	20	44	84	0.0327442	22	23	31	54
SH2D4A	8	19171080	19253729	8.24503e-05	29	20	44	84	0.0327442	22	23	31	54
CSGALNACT1	8	19261671	19540261	0.000139926	29	22	44	84	0.0327442	22	23	31	54
INTS10	8	19674917	19709586	0.000139926	29	22	44	84	0.0327442	22	23	31	54
LPL	8	19796581	19824770	0.000139926	29	22	44	84	0.0394786	22	24	31	54
SLC18A1	8	20002365	20040717	0.000139926	29	22	44	84	0.0394786	22	24	31	54
ATP6V1B2	8	20054703	20079207	0.000139926	29	22	44	84	0.0254663	23	24	31	54
LZTS1	8	20103675	20112803	0.000139926	29	22	44	84	0.0394786	22	24	31	54
LZTS1-AS1	8	20133283	20147969	0.000139926	29	22	44	84	0.0327442	22	23	31	54
LOC286114	8	20831496	20852630	0.000205226	29	23	44	84	0.0394786	21	22	31	54
GFRA2	8	21549529	21646346	0.000113765	30	23	44	84	0.0394786	21	22	31	54
DOK2	8	21766383	21771205	0.000113765	30	23	44	84	0.0394786	21	22	31	54
XPO7	8	21777179	21864096	0.000113765	30	23	44	84	0.0394786	21	22	31	54
NPM2	8	21882353	21894408	0.000113765	30	23	44	84	0.0394786	21	22	31	54
FGF17	8	21900427	21906319	0.000113765	30	23	44	84	0.0394786	21	22	31	54
FAM160B2	8	21946713	21961891	0.000113765	30	23	44	84	0.0394786	21	22	31	54
NUDT18	8	21964382	21966932	0.000113765	30	23	44	84	0.0394786	21	22	31	54
HR	8	21971931	21988565	0.000113765	30	23	44	84	0.0394786	21	22	31	54
REEP4	8	21995532	21999448	0.000113765	30	23	44	84	0.0394786	21	22	31	54
LGI3	8	22004342	22014344	0.000113765	30	23	44	84	0.0394786	21	22	31	54
SFTPC	8	22019183	22021991	0.000113765	30	23	44	84	0.0394786	21	22	31	54
BMP1	8	22022652	22069840	0.000113765	30	23	44	84	0.0394786	21	22	31	54
PHYHIP	8	22077215	22089851	0.000113765	30	23	44	84	0.0394786	21	22	31	54
MIR320A	8	22102474	22102556	0.000113765	30	23	44	84	0.0513563	21	23	31	54
POLR3D	8	22102618	22108680	0.000113765	30	23	44	84	0.0513563	21	23	31	54
PIWIL2	8	22132809	22213584	0.000113765	30	23	44	84	0.0513563	21	23	31	54
SLC39A14	8	22224761	22291640	0.000205226	29	23	44	84	0.0513563	21	23	31	54
PPP3CC	8	22298482	22398657	0.000205226	29	23	44	84	0.0394786	22	24	31	54
SORBS3	8	22409250	22433008	0.000113765	30	23	44	84	0.0394786	22	24	31	54
PDLIM2	8	22436253	22455538	0.000113765	30	23	44	84	0.0327442	22	23	31	54
C8orf58	8	22457113	22461662	0.000113765	30	23	44	84	0.0327442	22	23	31	54
BIN3	8	22477946	22526661	0.000149747	30	24	44	84	0.0327442	22	23	31	54
EGR3	8	22545173	22550815	0.000149747	30	24	44	84	0.0236373	22	22	31	54
PEBP4	8	22570764	22785421	0.000149747	30	24	44	84	0.0236373	22	22	31	54
RHOBTB2	8	22844929	22877710	0.000149747	30	24	44	84	0.0236373	22	22	31	54
TNFRSF10B	8	22877647	22926700	0.000149747	30	24	44	84	0.0236373	22	22	31	54
LOC286059	8	22925741	22941132	0.000149747	30	24	44	84	0.0169514	22	21	31	54
LOC254896	8	22941867	22961070	0.000149747	30	24	44	84	0.0129596	23	22	31	54
TNFRSF10C	8	22960326	22974950	0.000149747	30	24	44	84	0.0129596	23	22	31	54
TNFRSF10D	8	22993100	23021543	0.000149747	30	24	44	84	0.0129596	23	22	31	54
TNFRSF10A	8	23048969	23082680	0.000149747	30	24	44	84	0.0129596	23	22	31	54
LOC389641	8	23082733	23088439	0.000149747	30	24	44	84	0.0129596	23	22	31	54
CHMP7	8	23101149	23119512	0.000149747	30	24	44	84	0.0129596	23	22	31	54
R3HCC1	8	23145611	23153792	0.000149747	30	24	44	84	0.0129596	23	22	31	54
LOXL2	8	23154409	23261722	0.000149747	30	24	44	84	0.0129596	23	22	31	54
LOC100507156	8	23193720	23223638	0.000149747	30	24	44	84	0.0129596	23	22	31	54
ENTPD4	8	23286664	23315244	0.000149747	30	24	44	84	0.0115471	23	21	31	54
SLC25A37	8	23386362	23430063	0.000149747	30	24	44	84	0.0129596	23	22	31	54
NKX3-1	8	23536205	23540450	0.000212278	30	25	44	84	0.0129596	23	22	31	54
NKX2-6	8	23559963	23564111	0.000451322	29	25	44	84	0.0129596	23	22	31	54
STC1	8	23699433	23712320	0.000451322	29	25	44	84	0.0129596	23	22	31	54
ADAM28	8	24151579	24212726	0.000451322	29	25	44	84	0.0115471	23	21	31	54
ADAMDEC1	8	24241797	24263526	0.000451322	29	25	44	84	0.0169514	22	21	31	54
ADAM7	8	24298508	24367077	0.000451322	29	25	44	84	0.0169514	22	21	31	54
NEFM	8	24771273	24776606	0.000205226	29	23	44	84	0.031908	21	21	31	54
NEFL	8	24808468	24814131	0.000205226	29	23	44	84	0.031908	21	21	31	54
DOCK5	8	25042286	25270619	8.24503e-05	30	22	44	84	0.0129596	22	20	31	54
GNRH1	8	25276773	25282556	7.68016e-05	31	22	44	84	0.0129596	22	20	31	54
KCTD9	8	25285363	25315984	7.68016e-05	31	22	44	84	0.0129596	22	20	31	54
CDCA2	8	25316512	25365425	7.68016e-05	31	22	44	84	0.0129596	22	20	31	54
EBF2	8	25699245	25902640	8.24503e-05	30	22	44	84	0.0169514	22	21	31	54
PPP2R2A	8	26149006	26230195	7.56571e-05	31	21	44	84	0.0115471	22	19	31	54
BNIP3L	8	26240522	26270644	7.56571e-05	31	21	44	84	0.0115471	22	19	31	54
PNMA2	8	26362195	26371483	7.56571e-05	31	21	44	84	0.0115471	22	19	31	54
DPYSL2	8	26371708	26515693	7.56571e-05	31	21	44	84	0.0115471	22	19	31	54
ADRA1A	8	26605666	26722922	7.56571e-05	31	21	44	84	0.0160162	21	19	31	54
STMN4	8	27093813	27115903	7.56571e-05	31	21	44	84	0.0367932	19	18	31	54
TRIM35	8	27142403	27168834	7.56571e-05	31	21	44	84	0.0367932	19	18	31	54
PTK2B	8	27168998	27316908	7.56571e-05	31	21	44	84	0.0197499	20	18	31	54
CHRNA2	8	27317277	27336813	7.56571e-05	31	21	44	84	0.0143225	20	17	31	54
EPHX2	8	27348518	27402439	8.24503e-05	30	21	44	84	0.0143225	20	17	31	54
CLU	8	27454433	27472328	0.000205226	28	21	44	84	0.0143225	20	17	31	54
SCARA3	8	27491576	27534286	0.000205226	28	21	44	84	0.0197499	20	18	31	54
MIR3622B	8	27559189	27559284	0.000205226	28	21	44	84	0.0197499	20	18	31	54
MIR3622A	8	27559193	27559276	0.000205226	28	21	44	84	0.0197499	20	18	31	54
CCDC25	8	27590832	27630170	0.0002684	28	22	44	84	0.0197499	20	18	31	54
ESCO2	8	27632057	27662424	0.0002684	28	22	44	84	0.0197499	20	18	31	54
PBK	8	27667137	27695349	0.00103698	26	22	44	84	0.0197499	20	18	31	54
SCARA5	8	27727398	27850369	0.00103698	26	22	44	84	0.0197499	20	18	31	54
MIR4287	8	27743555	27743633	0.00103698	26	22	44	84	0.0197499	20	18	31	54
NUGGC	8	27879480	27941388	0.000899681	25	20	44	84	0.0143225	20	17	31	54
ELP3	8	27950583	28048669	0.000484481	26	20	44	84	0.0143225	20	17	31	54
PNOC	8	28174648	28200868	0.000484481	26	20	44	84	0.0143225	20	17	31	54
ZNF395	8	28203101	28243977	0.000899681	25	20	44	84	0.0143225	20	17	31	54
FBXO16	8	28285925	28347835	0.000899681	25	20	44	84	0.0143225	20	17	31	54
FZD3	8	28351721	28431785	0.000899681	25	20	44	84	0.0262244	19	17	31	54
MIR4288	8	28362632	28362699	0.000899681	25	20	44	84	0.0262244	19	17	31	54
EXTL3	8	28559152	28611202	0.000899681	25	20	44	84	0.0394786	18	17	31	54
INTS9	8	28625174	28747698	0.00160298	24	20	44	84	0.0394786	18	17	31	54
HMBOX1	8	28747910	28910242	0.00160298	24	20	44	84	0.0394786	18	17	31	54
KIF13B	8	28924794	29120610	0.00160298	24	20	44	84	0.0327442	18	16	31	54
DUSP4	8	29190578	29208267	0.00160298	24	20	44	84	0.0327442	18	16	31	54
LINC00589	8	29578775	29605625	0.00103698	24	19	44	84	0.0213491	18	15	31	54
LOC286135	8	29779028	29811123	0.00103698	24	19	44	84	0.0129596	19	15	31	54
MIR3148	8	29814787	29814864	0.00103698	24	19	44	84	0.0129596	19	15	31	54
MIR548O2	8	29920257	30108213	0.00103698	24	19	44	84	0.0129596	19	15	31	54
LEPROTL1	8	29952921	29995222	0.00103698	24	19	44	84	0.0213491	18	15	31	54
MBOAT4	8	29989186	30002200	0.00103698	24	19	44	84	0.0129596	19	15	31	54
DCTN6	8	30013812	30041155	0.00103698	24	19	44	84	0.0129596	19	15	31	54
LOC100128750	8	30239634	30242917	0.00103698	24	19	44	84	0.0129596	19	15	31	54
RBPMS	8	30241943	30429734	0.00103698	24	19	44	84	0.0129596	19	15	31	54
GTF2E2	8	30436030	30515738	0.00103698	24	19	44	84	0.0129596	19	15	31	54
LOC100507341	8	30496116	30503469	0.00103698	24	19	44	84	0.0129596	19	15	31	54
GSR	8	30535579	30585486	0.000536733	24	17	44	84	0.0129596	19	15	31	54
UBXN8	8	30601689	30624520	0.000808426	24	18	44	84	0.0129596	19	15	31	54
PPP2CB	8	30643125	30670352	0.000808426	24	18	44	84	0.0129596	19	15	31	54
TEX15	8	30689059	30706533	0.000808426	24	18	44	84	0.0129596	19	15	31	54
PURG	8	30853320	30891231	0.00155429	23	18	44	84	0.0213491	18	15	31	54
WRN	8	30890777	31031277	0.00155429	23	18	44	84	0.0154945	18	14	31	54
NRG1	8	31497267	32622558	0.00255948	22	18	44	84	0.00676535	19	13	31	54
NRG1-IT3	8	32298261	32300241	0.00155429	23	18	44	84	0.00676535	19	13	31	54
FUT10	8	33228343	33330664	0.00170482	22	17	44	84	0.0129596	18	13	31	54
MAK16	8	33342684	33358778	0.00170482	22	17	44	84	0.0129596	18	13	31	54
TTI2	8	33356026	33370703	0.00255948	22	18	44	84	0.0129596	18	13	31	54
RNF122	8	33405272	33424643	0.00255948	22	18	44	84	0.00676535	19	13	31	54
DUSP26	8	33448853	33457439	0.00255948	22	18	44	84	0.00676535	19	13	31	54
UNC5D	8	35092974	35652181	0.00261703	20	15	44	84	0.00676535	19	13	31	54
KCNU1	8	36641841	36793643	0.0129531	17	15	44	84	0.00676535	19	13	31	54
ZNF703	8	37553300	37556396	0.021635	16	15	44	84	0.00119217	20	11	31	54
ERLIN2	8	37594096	37615319	0.021635	16	15	44	84	0.00119217	20	11	31	54
LOC728024	8	37604073	37605564	0.021635	16	15	44	84	0.00119217	20	11	31	54
PROSC	8	37620100	37637286	0.0302293	16	16	44	84	0.00119217	20	11	31	54
GPR124	8	37654400	37701504	0.0302293	16	16	44	84	0.00119217	20	11	31	54
BRF2	8	37701397	37707431	0.0302293	16	16	44	84	0.00092144	20	10	31	54
RAB11FIP1	8	37716464	37757015	0.0302293	16	16	44	84	0.00092144	20	10	31	54
GOT1L1	8	37791799	37797647	0.0302293	16	16	44	84	0.00092144	20	10	31	54
ADRB3	8	37820513	37824184	0.0302293	16	16	44	84	0.00092144	20	10	31	54
EIF4EBP1	8	37888019	37917883	0.0302293	16	16	44	84	0.00092144	20	10	31	54
ASH2L	8	37963010	37997598	0.0302293	16	16	44	84	0.00092144	20	10	31	54
STAR	8	38000217	38008600	0.0302293	16	16	44	84	0.00092144	20	10	31	54
LSM1	8	38020838	38034248	0.0302293	16	16	44	84	0.00092144	20	10	31	54
BAG4	8	38034105	38070819	0.0302293	16	16	44	84	0.00092144	20	10	31	54
DDHD2	8	38089008	38120287	0.0302293	16	16	44	84	0.00092144	20	10	31	54
PPAPDC1B	8	38120649	38126738	0.0302293	16	16	44	84	0.00092144	20	10	31	54
WHSC1L1	8	38132560	38239790	0.0302293	16	16	44	84	0.00092144	20	10	31	54
LETM2	8	38243958	38266062	0.0302293	16	16	44	84	0.0018221	18	9	31	54
FGFR1	8	38268655	38326352	0.0381253	16	17	44	84	0.0018221	18	9	31	54
C8orf86	8	38368351	38386180	0.0381253	16	17	44	84	0.0018221	18	9	31	54
TACC1	8	38585703	38710546	0.0381253	16	17	44	84	0.00092144	19	9	31	54
HTRA4	8	38831667	38846181	0.0312698	17	18	44	84	0.00092144	19	9	31	54
TM2D2	8	38846326	38854041	0.0312698	17	18	44	84	0.00092144	19	9	31	54
ADAM9	8	38854504	38962779	0.0312698	17	18	44	84	0.00092144	19	9	31	54
ADAM32	8	38965049	39142436	0.0242299	17	17	44	84	0.00092144	19	8	31	54
ADAM5	8	39172181	39260375	0.0242299	19	20	44	84	0.0018221	18	9	31	54
LOC100130964	8	39420630	39437653	0.0302293	16	16	44	84	0.0010151	18	8	31	54
ADAM18	8	39442086	39587583	0.0381253	16	17	44	84	0.0010151	18	8	31	54
ADAM2	8	39601254	39695779	0.0381253	16	17	44	84	0.0010151	18	8	31	54
IDO1	8	39771327	39786309	0.0381253	16	17	44	84	0.0010151	18	8	31	54
IDO2	8	39792473	39873910	0.0242299	17	17	44	84	0.0010151	18	8	31	54
C8orf4	8	40010986	40012827	0.0196548	17	16	44	84	0.00092144	18	7	31	54
ZMAT4	8	40388110	40755343	0.0129531	17	15	44	84	0.00092144	18	7	31	54
SFRP1	8	41119475	41166990	0.0129531	17	15	44	84	0.00092144	18	7	31	54
GOLGA7	8	41348080	41368499	0.0196548	17	16	44	84	0.00092144	18	7	31	54
GINS4	8	41386724	41402565	0.0196548	17	16	44	84	0.000886172	19	7	31	54
AGPAT6	8	41435706	41482520	0.0196548	17	16	44	84	0.000886172	19	7	31	54
NKX6-3	8	41503828	41504878	0.0196548	17	16	44	84	0.000886172	19	7	31	54
ANK1	8	41510743	41754280	0.0196548	17	16	44	84	0.000886172	19	7	31	54
KAT6A	8	41786996	41909505	0.0302293	16	16	44	84	0.0010151	18	8	31	54
AP3M2	8	42010463	42028701	0.0480766	15	16	44	84	0.00232642	17	8	31	54
PLAT	8	42032235	42065194	0.0480766	15	16	44	84	0.00232642	17	8	31	54
IKBKB	8	42128819	42190171	0.0480766	15	16	44	84	0.00442087	17	9	31	54
POLB	8	42195972	42229331	0.0480766	15	16	44	84	0.00442087	17	9	31	54
SLC20A2	8	42273979	42397356	0.0381253	14	14	44	84	0.00451043	16	8	31	54
CHRNB3	8	42552561	42592209	0.0302293	14	13	44	84	0.0105018	14	7	31	54
CHRNA6	8	42607779	42623929	0.0302293	14	13	44	84	0.0115471	13	6	31	54
FNTA	8	42911441	42940932	0.0391987	12	11	44	84	0.00113992	12	2	31	54
HGSNAT	8	42995591	43057970	0.0302293	12	10	44	84	0.00266863	11	2	31	54
POTEA	8	43147584	43218328	0.032432	11	9	44	84	0.00266863	11	2	31	54
KLLN	10	89618917	89623194	0.00747607	16	12	44	84	0.0888835	14	13	31	54
PTEN	10	89623194	89728532	0.00385216	18	13	44	84	0.0367932	19	18	31	54
RNLS	10	90033620	90343082	0.0196548	15	13	44	84	0.0774741	18	19	31	54
LINC00550	13	69435416	69459457	0.0480766	13	13	44	84	0.0979029	11	9	31	54
LINC00381	13	74993309	75009296	0.0381253	14	14	44	84	0.0623589	11	8	31	54
LINC00347	13	75126979	75131257	0.0381253	14	14	44	84	0.0623589	11	8	31	54
CTAGE11P	13	75811888	75814517	0.0381253	14	14	44	84	0.0394786	11	7	31	54
TBC1D4	13	75858808	76056250	0.0480766	13	13	44	84	0.0394786	11	7	31	54
PSMD7	16	74330672	74340186	8.24503e-05	20	8	44	84	0.068699	13	11	31	54
LOC283922	16	74366303	74402153	8.24503e-05	21	9	44	84	0.068699	13	11	31	54
CLEC18B	16	74442528	74455368	8.24503e-05	22	10	44	84	0.0985208	13	12	31	54
GLG1	16	74481325	74641042	8.24503e-05	20	8	44	84	0.0985208	13	12	31	54
RFWD3	16	74655296	74700779	8.24503e-05	20	8	44	84	0.0985208	13	12	31	54
MLKL	16	74705752	74734789	8.24503e-05	20	8	44	84	0.0985208	13	12	31	54
FA2H	16	74746855	74808729	8.24503e-05	20	8	44	84	0.068699	13	11	31	54
WDR59	16	74907470	75019017	8.24503e-05	20	8	44	84	0.0985208	13	12	31	54
ZNRF1	16	75032914	75144892	8.24503e-05	20	8	44	84	0.0623589	14	12	31	54
LDHD	16	75145757	75150670	8.24503e-05	20	8	44	84	0.0623589	14	12	31	54
ZFP1	16	75182420	75206132	8.24503e-05	20	8	44	84	0.0623589	14	12	31	54
CTRB2	16	75237993	75241072	8.24503e-05	20	8	44	84	0.0367932	13	9	31	54
CTRB1	16	75252883	75258822	8.24503e-05	20	8	44	84	0.0367932	13	9	31	54
BCAR1	16	75262927	75301951	8.24503e-05	20	8	44	84	0.0367932	13	9	31	54
CFDP1	16	75327607	75467387	8.24503e-05	20	8	44	84	0.0394786	14	11	31	54
TMEM170A	16	75480922	75498584	8.24503e-05	20	8	44	84	0.0394786	14	11	31	54
CHST6	16	75507021	75528926	8.24503e-05	20	8	44	84	0.0394786	14	11	31	54
CHST5	16	75562427	75569068	8.24503e-05	20	8	44	84	0.0394786	14	11	31	54
TMEM231	16	75572014	75590170	8.24503e-05	20	8	44	84	0.0394786	14	11	31	54
GABARAPL2	16	75600248	75611779	8.24503e-05	20	8	44	84	0.0394786	14	11	31	54
ADAT1	16	75632246	75657221	8.24503e-05	20	8	44	84	0.0394786	14	11	31	54
KARS	16	75661621	75681585	8.24503e-05	20	8	44	84	0.0394786	14	11	31	54
TERF2IP	16	75681634	75691341	8.24503e-05	20	8	44	84	0.0394786	14	11	31	54
CNTNAP4	16	76311175	76593135	7.68016e-05	21	8	44	84	0.0394786	14	11	31	54
MIR4719	16	76902832	76902916	7.68016e-05	21	8	44	84	0.0394786	14	11	31	54
MON1B	16	77224835	77233543	8.24503e-05	20	8	44	84	0.068699	13	11	31	54
SYCE1L	16	77233348	77246976	8.24503e-05	20	8	44	84	0.068699	13	11	31	54
ADAMTS18	16	77316024	77469011	8.24503e-05	20	8	44	84	0.0985208	13	12	31	54
NUDT7	16	77756388	77776157	8.24503e-05	20	8	44	84	0.0985208	13	12	31	54
VAT1L	16	77822482	78014001	8.24503e-05	20	8	44	84	0.0985208	13	12	31	54
CLEC3A	16	78056442	78066001	7.68016e-05	21	8	44	84	0.0985208	13	12	31	54
MAF	16	79627744	79634622	0.000139926	20	9	44	84	0.0985208	13	12	31	54
DYNLRB2	16	80574853	80584541	0.000503581	19	10	44	84	0.0985208	13	12	31	54
CDYL2	16	80637675	80838175	0.000503581	19	10	44	84	0.0985208	13	12	31	54
CMC2	16	81009698	81040502	0.000808426	19	11	44	84	0.0985208	13	12	31	54
CENPN	16	81040102	81066709	0.000808426	19	11	44	84	0.0985208	13	12	31	54
ATMIN	16	81069457	81080951	0.000808426	19	11	44	84	0.0985208	13	12	31	54
C16orf46	16	81087101	81110872	0.000808426	19	11	44	84	0.0985208	13	12	31	54
GCSH	16	81115551	81129980	0.000808426	19	11	44	84	0.0985208	13	12	31	54
PKD1L2	16	81134483	81253975	0.000808426	19	11	44	84	0.0985208	13	12	31	54
GAN	16	81348570	81413803	0.000808426	19	11	44	84	0.068699	13	11	31	54
MIR4720	16	81418622	81418698	0.000808426	19	11	44	84	0.068699	13	11	31	54
CMIP	16	81478774	81745367	0.000808426	19	11	44	84	0.068699	13	11	31	54
LOC100129617	16	81698958	81700879	0.000808426	19	11	44	84	0.068699	13	11	31	54
PLCG2	16	81812898	81991899	0.000808426	19	11	44	84	0.0623589	14	12	31	54
SDR42E1	16	82031250	82045093	0.00125233	19	12	44	84	0.0623589	14	12	31	54
HSD17B2	16	82068857	82132139	0.00125233	19	12	44	84	0.0623589	14	12	31	54
CDH13	16	82660398	83830215	0.00125233	19	12	44	84	0.0623589	14	12	31	54
MIR3182	16	83541950	83542013	0.00125233	19	12	44	84	0.068699	13	11	31	54
HSBP1	16	83841507	83846607	0.00125233	19	12	44	84	0.0394786	14	11	31	54
MLYCD	16	83932729	83949787	0.00125233	19	12	44	84	0.0394786	14	11	31	54
OSGIN1	16	83986826	83999937	0.000721862	20	12	44	84	0.0394786	14	11	31	54
NECAB2	16	84002236	84036379	0.000721862	20	12	44	84	0.0394786	14	11	31	54
SLC38A8	16	84043388	84075762	0.000721862	20	12	44	84	0.0394786	14	11	31	54
MBTPS1	16	84087368	84150517	0.000721862	20	12	44	84	0.0394786	14	11	31	54
HSDL1	16	84155743	84178800	0.000721862	20	12	44	84	0.0394786	14	11	31	54
DNAAF1	16	84178864	84211524	0.000721862	20	12	44	84	0.0394786	14	11	31	54
TAF1C	16	84211452	84220676	0.00103698	20	13	44	84	0.0394786	14	11	31	54
ADAD2	16	84224722	84230772	0.000721862	20	12	44	84	0.0394786	14	11	31	54
KCNG4	16	84254740	84273356	0.000721862	20	12	44	84	0.0394786	14	11	31	54
WFDC1	16	84328400	84363450	0.000721862	20	12	44	84	0.0394786	14	11	31	54
ATP2C2	16	84402132	84497793	0.000721862	20	12	44	84	0.0623589	14	12	31	54
COTL1	16	84599203	84651669	0.000584234	21	13	44	84	0.0623589	14	12	31	54
KLHL36	16	84682130	84695916	0.000584234	21	13	44	84	0.0623589	14	12	31	54
USP10	16	84733554	84813527	0.000584234	21	13	44	84	0.0393342	15	12	31	54
CRISPLD2	16	84853586	84943116	0.000584234	21	13	44	84	0.050531	15	13	31	54
ZDHHC7	16	85008066	85045141	0.000584234	21	13	44	84	0.050531	15	13	31	54
KIAA0513	16	85061409	85127828	0.000584234	21	13	44	84	0.0327442	16	13	31	54
FAM92B	16	85131964	85146114	0.000584234	21	13	44	84	0.0327442	16	13	31	54
LOC400548	16	85170755	85183049	0.000409894	21	12	44	84	0.0327442	16	13	31	54
LINC00311	16	85316563	85321685	0.000584234	21	13	44	84	0.0327442	16	13	31	54
MIR5093	16	85339831	85339931	0.000584234	21	13	44	84	0.0327442	16	13	31	54
GSE1	16	85645028	85709812	0.000409894	21	12	44	84	0.050531	15	13	31	54
GINS2	16	85711279	85722588	0.000409894	21	12	44	84	0.0327442	16	13	31	54
C16orf74	16	85741123	85784689	0.000409894	21	12	44	84	0.0327442	16	13	31	54
MIR1910	16	85775226	85775306	0.000409894	21	12	44	84	0.0327442	16	13	31	54
EMC8	16	85812230	85833148	0.000409894	21	12	44	84	0.0327442	16	13	31	54
COX4I1	16	85833172	85840607	0.000409894	21	12	44	84	0.0327442	16	13	31	54
IRF8	16	85932773	85956211	0.000409894	21	12	44	84	0.0227311	16	12	31	54
LOC146513	16	86320036	86326995	0.000205226	21	11	44	84	0.0394786	14	11	31	54
LOC732275	16	86365455	86379285	0.000205226	21	11	44	84	0.0394786	14	11	31	54
FOXF1	16	86544132	86548070	0.000205226	21	11	44	84	0.0394786	14	11	31	54
MTHFSD	16	86563781	86588841	0.000205226	21	11	44	84	0.0394786	14	11	31	54
FLJ30679	16	86588925	86590905	0.000205226	21	11	44	84	0.0394786	14	11	31	54
FOXC2	16	86600856	86602537	0.000205226	21	11	44	84	0.0394786	14	11	31	54
FOXL1	16	86612114	86615304	0.000205226	21	11	44	84	0.0394786	14	11	31	54
C16orf95	16	87336403	87351026	0.000205226	21	11	44	84	0.0394786	14	11	31	54
FBXO31	16	87362941	87425708	0.000429708	20	11	44	84	0.0394786	14	11	31	54
MAP1LC3B	16	87425800	87438380	0.000429708	20	11	44	84	0.0312299	14	10	31	54
ZCCHC14	16	87439851	87525460	0.000429708	20	11	44	84	0.0312299	14	10	31	54
JPH3	16	87636498	87731761	0.000429708	20	11	44	84	0.0394786	14	11	31	54
KLHDC4	16	87741417	87799598	0.000429708	20	11	44	84	0.0394786	14	11	31	54
SLC7A5	16	87863628	87903100	0.000429708	20	11	44	84	0.0394786	14	11	31	54
CA5A	16	87921624	87970112	0.000429708	20	11	44	84	0.0213491	18	15	31	54
BANP	16	87985037	88110924	0.000429708	20	11	44	84	0.0213491	18	15	31	54
ACSF3	16	89160216	89222171	0.000808426	19	11	44	84	0.00971985	15	8	31	54
LINC00304	16	89225627	89230083	0.000808426	19	11	44	84	0.00471271	15	7	31	54
LOC400558	16	89232790	89235555	0.000808426	19	11	44	84	0.00471271	15	7	31	54
CDH15	16	89238162	89261900	0.000808426	19	11	44	84	0.00471271	15	7	31	54
SLC22A31	16	89262168	89266529	0.0015606	18	11	44	84	0.00471271	15	7	31	54
ZNF778	16	89284110	89295965	0.0015606	18	11	44	84	0.0143225	13	7	31	54
ANKRD11	16	89334028	89556969	0.000808426	19	11	44	84	0.0312299	14	10	31	54
LOC100287036	16	89387540	89391518	0.000808426	19	11	44	84	0.0393342	15	12	31	54
SPG7	16	89574804	89624174	0.0015606	18	11	44	84	0.0227311	16	12	31	54
RPL13	16	89627064	89633237	0.0015606	18	11	44	84	0.0312299	14	10	31	54
SNORD68	16	89627837	89627909	0.0015606	18	11	44	84	0.0312299	14	10	31	54
CPNE7	16	89642175	89663654	0.0015606	18	11	44	84	0.0312299	14	10	31	54
DPEP1	16	89679715	89704839	0.0015606	18	11	44	84	0.0464245	13	10	31	54
CHMP1A	16	89710838	89724129	0.0015606	18	11	44	84	0.0464245	13	10	31	54
CDK10	16	89753075	89762772	0.00292599	17	11	44	84	0.0464245	13	10	31	54
SPATA2L	16	89762764	89768121	0.00292599	17	11	44	84	0.0464245	13	10	31	54
VPS9D1	16	89773540	89787394	0.00292599	17	11	44	84	0.0464245	13	10	31	54
LOC100128881	16	89778263	89784573	0.00292599	17	11	44	84	0.0464245	13	10	31	54
ZNF276	16	89787392	89807332	0.00292599	17	11	44	84	0.0464245	13	10	31	54
FANCA	16	89803958	89883065	0.00170482	17	10	44	84	0.0464245	13	10	31	54
SPIRE2	16	89894906	89937727	0.000946024	18	10	44	84	0.0115471	12	5	31	54
TCF25	16	89939993	89977792	0.000946024	18	10	44	84	0.00658916	13	5	31	54
MC1R	16	89984286	89987385	0.00170482	17	10	44	84	0.0129596	11	4	31	54
TUBB3	16	89988416	90002505	0.00170482	17	10	44	84	0.0129596	11	4	31	54
DEF8	16	90015138	90034468	0.00170482	17	10	44	84	0.0129596	11	4	31	54
CENPBD1	16	90036182	90039240	0.00170482	17	10	44	84	0.0166647	11	5	31	54
AFG3L1P	16	90038987	90067195	0.00170482	17	10	44	84	0.0115471	12	5	31	54
DBNDD1	16	90071278	90085937	0.00170482	17	10	44	84	0.0115471	12	5	31	54
GAS8	16	90089007	90111379	0.00170482	17	10	44	84	0.0115471	12	5	31	54
LOC100130015	16	90106168	90114191	0.00170482	17	10	44	84	0.0115471	12	5	31	54
PRDM7	16	90122973	90142338	0.00170482	17	10	44	84	0.0115471	12	5	31	54
DERL2	17	5377612	5389494	0.0257089	10	7	44	84	0.0985208	7	4	31	54
MIS12	17	5389693	5394130	0.0257089	10	7	44	84	0.0985208	7	4	31	54
LOC728392	17	5402746	5404319	0.0257089	10	7	44	84	0.0985208	7	4	31	54
ATP1B2	17	7554253	7561089	0.0391987	12	11	44	84	0.085887	12	10	31	54
EFNB3	17	7608519	7614693	0.0391987	12	11	44	84	0.085887	9	6	31	54
DNAH2	17	7623038	7737058	0.0391987	12	11	44	84	0.0623589	11	8	31	54
RPL29P2	17	7657637	7658286	0.0391987	12	11	44	84	0.0623589	11	8	31	54
KDM6B	17	7743234	7758118	0.0391987	12	11	44	84	0.0728764	10	7	31	54
TMEM88	17	7758383	7759417	0.0302293	12	10	44	84	0.0728764	10	7	31	54
CYB5D1	17	7761063	7765600	0.0302293	12	10	44	84	0.0728764	10	7	31	54
CHD3	17	7788122	7816075	0.0302293	12	10	44	84	0.0728764	10	7	31	54
SCARNA21	17	7809440	7809578	0.0302293	12	10	44	84	0.0728764	10	7	31	54
LOC284023	17	7816639	7819265	0.0302293	12	10	44	84	0.0728764	10	7	31	54
KCNAB3	17	7825176	7832753	0.0302293	12	10	44	84	0.0728764	10	7	31	54
TRAPPC1	17	7833662	7835317	0.0302293	12	10	44	84	0.0728764	10	7	31	54
CNTROB	17	7835441	7853237	0.0302293	12	10	44	84	0.0728764	10	7	31	54
GUCY2D	17	7905987	7923658	0.0302293	12	10	44	84	0.085887	9	6	31	54
ALOX15B	17	7942357	7952451	0.0302293	12	10	44	84	0.085887	9	6	31	54
ALOX12B	17	7975953	7991021	0.0129531	12	8	44	84	0.085887	9	6	31	54
MIR4314	17	7991373	7991465	0.0129531	12	8	44	84	0.085887	9	6	31	54
ALOXE3	17	7999217	8022234	0.0129531	12	8	44	84	0.085887	9	6	31	54
HES7	17	8023907	8027410	0.00893325	12	7	44	84	0.050531	9	5	31	54
PER1	17	8043787	8055753	0.00893325	12	7	44	84	0.050531	9	5	31	54
VAMP2	17	8062464	8066293	0.00893325	12	7	44	84	0.050531	9	5	31	54
TMEM107	17	8076296	8079714	0.00893325	12	7	44	84	0.050531	9	5	31	54
MIR4521	17	8090262	8090322	0.00487969	13	7	44	84	0.050531	9	5	31	54
MIR3676	17	8090492	8090577	0.00487969	13	7	44	84	0.050531	9	5	31	54
C17orf59	17	8091650	8093564	0.00893325	12	7	44	84	0.050531	9	5	31	54
AURKB	17	8108048	8113944	0.00893325	12	7	44	84	0.050531	9	5	31	54
LINC00324	17	8123947	8127361	0.00893325	12	7	44	84	0.050531	9	5	31	54
CTC1	17	8128138	8151413	0.00893325	12	7	44	84	0.050531	9	5	31	54
PFAS	17	8152595	8173809	0.0145384	11	7	44	84	0.0947872	8	5	31	54
SLC25A35	17	8191081	8198170	0.0145384	11	7	44	84	0.0550135	8	4	31	54
RANGRF	17	8191968	8193409	0.0145384	11	7	44	84	0.0550135	8	4	31	54
ARHGEF15	17	8213555	8225834	0.0145384	11	7	44	84	0.0550135	8	4	31	54
LOC100128288	17	8261730	8263859	0.0145384	11	7	44	84	0.0947872	8	5	31	54
KRBA2	17	8271972	8274858	0.0145384	11	7	44	84	0.0947872	8	5	31	54
RPL26	17	8280833	8286565	0.0145384	11	7	44	84	0.0947872	8	5	31	54
RNF222	17	8294022	8301144	0.0145384	11	7	44	84	0.0947872	8	5	31	54
NDEL1	17	8339169	8371495	0.0145384	11	7	44	84	0.0947872	8	5	31	54
MYH10	17	8377522	8534079	0.0145384	11	7	44	84	0.0947872	8	5	31	54
CCDC42	17	8633245	8648154	0.0145384	11	7	44	84	0.0947872	8	5	31	54
SPDYE4	17	8656423	8661877	0.0145384	11	7	44	84	0.0947872	8	5	31	54
MFSD6L	17	8700427	8702667	0.0145384	11	7	44	84	0.0947872	8	5	31	54
PIK3R6	17	8706054	8770994	0.0145384	11	7	44	84	0.0947872	8	5	31	54
PIK3R5	17	8782232	8869029	0.00912115	11	6	44	84	0.0947872	8	5	31	54
NTN1	17	8924858	9147317	0.00912115	11	6	44	84	0.0947872	8	5	31	54
STX8	17	9153787	9479275	0.00912115	11	6	44	84	0.0947872	8	5	31	54
USP43	17	9548853	9633003	0.00912115	11	6	44	84	0.0985208	7	4	31	54
DHRS7C	17	9674750	9694614	0.00912115	11	6	44	84	0.0985208	7	4	31	54
GLP2R	17	9729380	9793022	0.00912115	11	6	44	84	0.0985208	7	4	31	54
RCVRN	17	9801026	9808684	0.00912115	11	6	44	84	0.0985208	7	4	31	54
GAS7	17	9813925	10101868	0.0145384	11	7	44	84	0.0985208	7	4	31	54
MYH13	17	10204182	10276322	0.0145384	11	7	44	84	0.0985208	7	4	31	54
MYH8	17	10293641	10325267	0.0145384	11	7	44	84	0.0985208	7	4	31	54
MYH4	17	10346607	10372876	0.0145384	11	7	44	84	0.0985208	7	4	31	54
MYH1	17	10395626	10421859	0.0145384	11	7	44	84	0.0985208	7	4	31	54
MYH2	17	10424464	10453017	0.0145384	11	7	44	84	0.0985208	7	4	31	54
MYH3	17	10531842	10560626	0.0257089	10	7	44	84	0.0985208	7	4	31	54
SCO1	17	10583648	10600885	0.0257089	10	7	44	84	0.0985208	7	4	31	54
PSMG1	21	40547371	40555440	0.0249676	15	14	44	84	0.0985208	13	12	31	54
BRWD1	21	40557403	40685712	0.0249676	15	14	44	84	0.0985208	13	12	31	54
BRWD1-AS1	21	40687632	40695144	0.0249676	15	14	44	84	0.0985208	13	12	31	54
HMGN1	21	40714240	40721047	0.0381253	14	14	44	84	0.0985208	13	12	31	54
WRB	21	40752212	40769815	0.0381253	14	14	44	84	0.0985208	13	12	31	54
LCA5L	21	40777769	40816128	0.0381253	14	14	44	84	0.0985208	13	12	31	54
IGSF5	21	41117333	41174023	0.0381253	14	14	44	84	0.0888835	14	13	31	54
MIR4760	21	41584278	41584358	0.0381253	14	14	44	84	0.0985208	13	12	31	54
DSCAM-AS1	21	41755009	41757285	0.0381253	14	14	44	84	0.0985208	13	12	31	54
DSCAM-IT1	21	41990432	42002693	0.0381253	14	14	44	84	0.0985208	13	12	31	54
